# Supplementary material for: Cobalt(iii)-catalyzed annulation of esters and alkynes: a facile route to indenones
Source: Royal Society of Chemistry journal article supplement (doi:10.1039/c6cc02468h), 2016-01-01

## Supporting Information

### Cobalt(III)-Catalyzed Annulation of Esters and Alkynes: A Facile Route to Indenones

Wenlong Yu,<sup>a</sup> Wei Zhang,<sup>a</sup> Zhanxiang Liu,<sup>a</sup> Yuhong Zhang<sup>\*,a,b</sup>

<sup>a</sup>*Department of Chemistry, Zhejiang University, Hangzhou 310027, China*

<sup>b</sup>*State Key Laboratory of Applied Organic Chemistry, Lanzhou University, Lanzhou  
730000, China*

**E-mail:** [yhzhang@zju.edu.cn](mailto:yhzhang@zju.edu.cn)

|                                                         |     |
|---------------------------------------------------------|-----|
| General Information.....                                | S2  |
| The Optimization of the reaction conditions.....        | S2  |
| Typical Procedure for the Product.....                  | S3  |
| Characterization of products.....                       | S3  |
| Mechanism experiments.....                              | S13 |
| References.....                                         | S17 |
| <sup>1</sup> H NMR and <sup>13</sup> C NMR Spectra..... | S18 |

**General** All reactions were performed under nitrogen in a flame-dried reaction flask. The esters were purchased from commercial resources. The Cp\*Co(CO)I<sub>2</sub><sup>1</sup>, *d*<sub>5</sub>-methyl benzoate<sup>2</sup> and (*E*)-methyl-2-(1,2-diphenylvinyl)benzoate (**4a**)<sup>3</sup> were prepared according the previous reports. <sup>1</sup>H NMR spectra were recorded at 400 MHz using TMS as internal standard. <sup>13</sup>C NMR spectra were recorded at 100 MHz using TMS as internal standard. The multiplicities are reported as follows: singlet (s), doublet (d), doublet of doublets (dd), multiplet (m), and broad resonances (br). Mass spectroscopy data of the products were collected on an HRMS-TOF instrument. GC-MS spectra were recorded using a HP6890 gas chromatograph with a HP5973 mass spectrometric detector equipped with an electron ionization source and a single-stage quadrupole. MALDI-TOF analysis was carried out on an ultrafleXtreme MALDI-TOF/TOF Mass Spectrometer (Bruker Daltonics, USA).

### The Optimization of the reaction conditions<sup>a,b</sup>

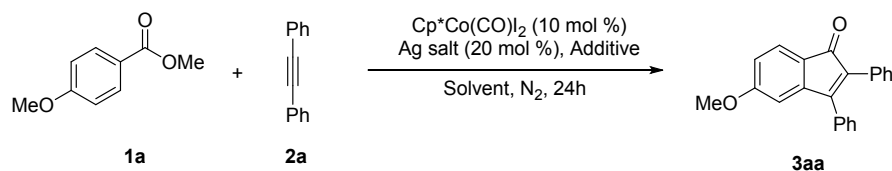

| entry | catalyst (mol %)        | Ag salt            | additive1 (mol %)         | additive2 (mol %)                      | solvent | Temp   | yield (%) <sup>b</sup> |
|-------|-------------------------|--------------------|---------------------------|----------------------------------------|---------|--------|------------------------|
| 1     | Cp*Co(CO)I <sub>2</sub> | AgSbF <sub>6</sub> | Cu(OAc) <sub>2</sub> (20) | -                                      | DCE     | 130 °C | 32                     |
| 2     | Cp*Co(CO)I <sub>2</sub> | AgSbF <sub>6</sub> | AgOAc (20)                | -                                      | DCE     | 130 °C | 25                     |
| 3     | Cp*Co(CO)I <sub>2</sub> | AgSbF <sub>6</sub> | AgOPiv (20)               | -                                      | DCE     | 130 °C | 40                     |
| 4     | Cp*Co(CO)I <sub>2</sub> | AgSbF <sub>6</sub> | HOAc (20)                 | -                                      | DCE     | 130 °C | 22                     |
| 5     | Cp*Co(CO)I <sub>2</sub> | AgSbF <sub>6</sub> | HOAc (200)                | -                                      | DCE     | 130 °C | Trace                  |
| 6     | Cp*Co(CO)I <sub>2</sub> | AgSbF <sub>6</sub> | NaOAc (20)                | -                                      | DCE     | 130 °C | 54                     |
| 7     | Cp*Co(CO)I <sub>2</sub> | AgSbF <sub>6</sub> | KOAc (20)                 | -                                      | DCE     | 130 °C | 70                     |
| 8     | Cp*Co(CO)I <sub>2</sub> | AgSbF <sub>6</sub> | KOPiv (20)                | -                                      | DCE     | 130 °C | 65                     |
| 9     | Cp*Co(CO)I <sub>2</sub> | AgSbF <sub>6</sub> | AdCOOK (20)               | -                                      | DCE     | 130 °C | Trace                  |
| 10    | Cp*Co(CO)I <sub>2</sub> | AgSbF <sub>6</sub> | MesCOOK (20)              | -                                      | DCE     | 130 °C | 40                     |
| 11    | Cp*Co(CO)I <sub>2</sub> | AgSbF <sub>6</sub> | PhCOOK (20)               | -                                      | DCE     | 130 °C | Trace                  |
| 12    | Cp*Co(CO)I <sub>2</sub> | AgOTf              | KOAc (20)                 | -                                      | DCE     | 130 °C | NR                     |
| 13    | Cp*Co(CO)I <sub>2</sub> | AgBF <sub>4</sub>  | KOAc (20)                 | -                                      | DCE     | 130 °C | NR                     |
| 14    | Cp*Co(CO)I <sub>2</sub> | AgPF <sub>6</sub>  | KOAc (20)                 | -                                      | DCE     | 130 °C | NR                     |
| 15    | Cp*Co(CO)I <sub>2</sub> | AgNTf <sub>2</sub> | KOAc (20)                 | -                                      | DCE     | 130 °C | 50                     |
| 16    | Cp*Co(CO)I <sub>2</sub> | AgSbF <sub>6</sub> | KOAc (20)                 | AgNTf <sub>2</sub> (20)                | DCE     | 130 °C | 44                     |
| 17    | Cp*Co(CO)I <sub>2</sub> | AgSbF <sub>6</sub> | KOAc (20)                 | AgOTf (20)                             | DCE     | 130 °C | NR                     |
| 18    | Cp*Co(CO)I <sub>2</sub> | AgSbF <sub>6</sub> | KOAc (20)                 | AgBF <sub>4</sub> (20)                 | DCE     | 130 °C | 15                     |
| 19    | Cp*Co(CO)I <sub>2</sub> | AgSbF <sub>6</sub> | KOAc (20)                 | Zn(OTf) <sub>2</sub> (20)              | DCE     | 130 °C | NR                     |
| 20    | Cp*Co(CO)I <sub>2</sub> | AgSbF <sub>6</sub> | KOAc (20)                 | ZnBr <sub>2</sub> (20)                 | DCE     | 130 °C | NR                     |
| 21    | Cp*Co(CO)I <sub>2</sub> | AgSbF <sub>6</sub> | KOAc (20)                 | Cu(OTf) <sub>2</sub> (20)              | DCE     | 130 °C | NR                     |
| 22    | Cp*Co(CO)I <sub>2</sub> | AgSbF <sub>6</sub> | KOAc (20)                 | Sc(OTf) <sub>3</sub> (20)              | DCE     | 130 °C | NR                     |
| 23    | Cp*Co(CO)I <sub>2</sub> | AgSbF <sub>6</sub> | KOAc (20)                 | BPh <sub>3</sub> (100)                 | DCE     | 130 °C | 65                     |
| 24    | Cp*Co(CO)I <sub>2</sub> | AgSbF <sub>6</sub> | KOAc (20)                 | BF <sub>3</sub> ·OEt <sub>2</sub> (20) | DCE     | 130 °C | NR                     |

|                 |                                      |                    |                           |                           |                   |        |       |
|-----------------|--------------------------------------|--------------------|---------------------------|---------------------------|-------------------|--------|-------|
| 25              | Cp*Co(CO)I <sub>2</sub>              | AgSbF <sub>6</sub> | -                         | Zn(OTf) <sub>2</sub> (20) | DCE               | 130 °C | NR    |
| 26              | Cp*Co(CO)I <sub>2</sub>              | AgSbF <sub>6</sub> | -                         | Cu(OTf) <sub>2</sub> (20) | DCE               | 130 °C | NR    |
| 27              | Cp*Co(CO)I <sub>2</sub>              | AgSbF <sub>6</sub> | -                         | Sc(OTf) <sub>3</sub> (20) | DCE               | 130 °C | NR    |
| 28              | Cp*Co(CO)I <sub>2</sub>              | AgSbF <sub>6</sub> | KOAc (20)                 | -                         | PhMe              | 130 °C | NR    |
| 29              | Cp*Co(CO)I <sub>2</sub>              | AgSbF <sub>6</sub> | KOAc (20)                 | -                         | PhCF <sub>3</sub> | 130 °C | 63    |
| 30              | Cp*Co(CO)I <sub>2</sub>              | AgSbF <sub>6</sub> | KOAc (20)                 | -                         | PhCl              | 130 °C | 59    |
| 31              | Cp*Co(CO)I <sub>2</sub>              | AgSbF <sub>6</sub> | KOAc (20)                 | -                         | PhF               | 130 °C | NR    |
| 32              | Cp*Co(CO)I <sub>2</sub>              | AgSbF <sub>6</sub> | KOAc (20)                 | -                         | <i>o</i> -DCB     | 130 °C | 55    |
| 33              | Cp*Co(CO)I <sub>2</sub>              | AgSbF <sub>6</sub> | KOAc (20)                 | -                         | <i>t</i> -AmOH    | 130 °C | NR    |
| 34              | Cp*Co(CO)I <sub>2</sub>              | AgSbF <sub>6</sub> | KOAc (20)                 | -                         | TFE               | 130 °C | Trace |
| 35              | Cp*Co(CO)I <sub>2</sub>              | AgSbF <sub>6</sub> | KOAc (20)                 | -                         | DCE               | 120 °C | 65    |
| 36              | Cp*Co(CO)I <sub>2</sub>              | AgSbF <sub>6</sub> | KOAc (20)                 | -                         | DCE               | 140 °C | 69    |
| 37              | Cp*Co(CO)I <sub>2</sub>              | none               | KOAc (20)                 | -                         | DCE               | 130 °C | NR    |
| 38              | Cp*Co(CO)I <sub>2</sub>              | AgSbF <sub>6</sub> | none                      | -                         | DCE               | 130 °C | NR    |
| 39              | [Cp*RhCl <sub>2</sub> ] <sub>2</sub> | AgSbF <sub>6</sub> | KOAc (20)                 | -                         | DCE               | 130 °C | Trace |
| 40 <sup>c</sup> | [Cp*RhCl <sub>2</sub> ] <sub>2</sub> | AgSbF <sub>6</sub> | Cu(OAc) <sub>2</sub> (20) | -                         | DCE               | 130 °C | 6     |
| 41              | none                                 | AgSbF <sub>6</sub> | KOAc (20)                 | -                         | DCE               | 130 °C | NR    |
| 42              | Co(OAc) <sub>2</sub>                 | AgSbF <sub>6</sub> | KOAc (20)                 | -                         | DCE               | 130 °C | NR    |
| 43              | CoCl <sub>2</sub>                    | AgSbF <sub>6</sub> | KOAc (20)                 | -                         | DCE               | 130 °C | NR    |

<sup>a</sup>Reaction conditions: substrate **1a** (0.1 mmol), diphenylacetylene **2a** (0.15 mmol), Cp\*Co(CO)I<sub>2</sub> (10 mol%), Ag salts (20 mol%), additive **1** (20 mol%), solvent (1 mL), 130 °C, N<sub>2</sub>, 24 h. <sup>b</sup>Isolated yields. <sup>c</sup>determined by GC-MS. TFE = CF<sub>3</sub>CH<sub>2</sub>OH, *o*-DCB = *o*-dichlorobenzene

## Typical Procedure for the Product

The methyl 4-methoxybenzoate (0.1 mmol) and diphenylacetylene (0.15 mmol) were dissolved in 1mL DCE in a sealed tube. 5 mg (10 mol%) Cp\*Co(CO)I<sub>2</sub>, 7 mg (20 mol%) AgSbF<sub>6</sub> and 2 mg (20 mol%) KOAc were added. The tube was stirred at 130 °C for 24 h under N<sub>2</sub>. The solvent was removed in vacuum and the product was isolated through column chromatography to afford the corresponding indenones.

2,3-diphenyl-1H-inden-1-one (eluent: petroleum ether(**PE**)→ethyl acetate(**EA**):petroleum ether(**PE**) = 1:200)

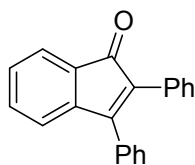

### 3ba

Yield: 74%; Red solid; <sup>1</sup>H NMR (CDCl<sub>3</sub>, 400 MHz) δ 7.59 (d, *J* = 8 Hz, 1H), 7.35-7.42 (m, 6H), 7.25-7.31 (m, 6H), 7.15 (d, *J* = 8 Hz, 1H). <sup>13</sup>C NMR (CDCl<sub>3</sub>, 100 MHz) δ 196.6, 155.4, 145.3, 133.5, 132.7, 132.4, 130.8, 130.8, 130.0, 129.3, 129.0, 128.8,

128.5, 128.1, 127.8, 123.0, 121.3. HRMS (EI-TOF) calcd for C<sub>21</sub>H<sub>14</sub>O (M<sup>+</sup>): 282.1045, found: 282.1045.

5-methoxy-2,3-diphenyl-1H-inden-1-one (eluent: PE→PE/EA = 100/1)

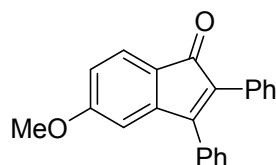

**3aa**

Yield: 70%; Red solid; <sup>1</sup>H NMR (CDCl<sub>3</sub>, 400 MHz) δ 7.55 (d, *J* = 8 Hz, 1H), 7.34-7.41 (m, 5H), 7.26 (s, 5H), 6.66-6.70 (m, 2H), 3.84 (s, 3H). <sup>13</sup>C NMR (CDCl<sub>3</sub>, 100 MHz) δ 195.2, 164.5, 153.1, 147.9, 133.9, 132.7, 130.9, 130.0, 129.2, 128.8, 128.6, 128.1, 127.8, 124.9, 123.5, 110.5, 110.3, 55.8. HRMS (EI-TOF) calcd for C<sub>22</sub>H<sub>16</sub>O<sub>2</sub> (M<sup>+</sup>): 312.1150, found: 312.1153.

5-methyl-2,3-diphenyl-1H-inden-1-one (eluent: PE→PE/EA = 200/1)

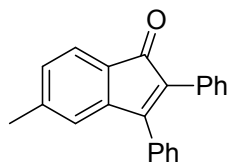

**3ca**

Yield: 71%; Red solid; <sup>1</sup>H NMR (CDCl<sub>3</sub>, 400 MHz) δ 7.48 (d, *J* = 8 Hz, 1H), 7.36-7.43 (m, 5H), 7.26 (s, 5H), 7.08 (d, *J* = 8 Hz, 1H), 6.94 (s, 1H), 2.35 (s, 3H). <sup>13</sup>C NMR (CDCl<sub>3</sub>, 100 MHz) δ 196.3, 155.0, 145.7, 144.5, 132.9, 132.8, 130.9, 130.0, 129.2, 129.0, 128.8, 128.5, 128.4, 128.1, 127.7, 123.1, 122.6, 22.1. HRMS (EI-TOF) calcd for C<sub>22</sub>H<sub>16</sub>O (M<sup>+</sup>): 296.1201, found: 296.1201.

7-methyl-2,3-diphenyl-1H-inden-1-one (eluent: PE→PE/EA = 200/1)

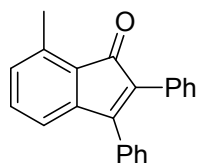

**3da**

Yield: 60%; Red solid;  $^1\text{H}$  NMR ( $\text{CDCl}_3$ , 400 MHz)  $\delta$  7.34-7.40 (m, 5H), 7.21-7.26 (m, 6H), 7.06 (d,  $J = 8$  Hz, 1H), 6.97 (d,  $J = 8$  Hz, 1H), 2.61 (s, 3H).  $^{13}\text{C}$  NMR ( $\text{CDCl}_3$ , 100 MHz)  $\delta$  197.7, 154.3, 145.7, 138.0, 132.9, 132.6, 132.4, 132.2, 130.9, 130.1, 129.1, 128.7, 128.6, 128.0, 127.6, 127.1, 119.3, 17.4. HRMS (EI-TOF) calcd for  $\text{C}_{22}\text{H}_{16}\text{O}$  ( $\text{M}^+$ ): 296.1201, found: 296.1204.

6-methyl-2,3-diphenyl-1H-inden-1-one (eluent: PE  $\rightarrow$  PE/EA = 200/1)

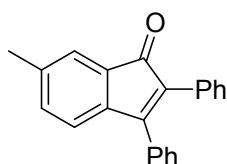

**3ea**

Yield: 64%; Red solid;  $^1\text{H}$  NMR ( $\text{CDCl}_3$ , 400 MHz)  $\delta$  7.37-7.41 (m, 6H), 7.24-7.26 (m, 5H), 7.15 (d,  $J = 8$  Hz, 1H), 7.02 (d,  $J = 8$  Hz, 1H), 2.38 (s, 3H).  $^{13}\text{C}$  NMR ( $\text{CDCl}_3$ , 100 MHz)  $\delta$  196.8, 155.6, 142.4, 139.3, 133.3, 132.9, 131.9, 131.1, 130.9, 130.0, 129.3, 128.8, 128.5, 128.1, 127.6, 124.1, 121.2, 21.4. HRMS (EI-TOF) calcd for  $\text{C}_{22}\text{H}_{16}\text{O}$  ( $\text{M}^+$ ): 296.1201, found: 296.1203.

5-(tert-butyl)-2,3-diphenyl-1H-inden-1-one (eluent: PE  $\rightarrow$  PE/EA = 200/1)

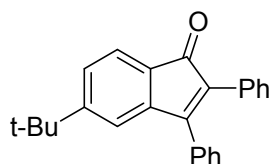

**3fa**

Yield: 68%; Red solid;  $^1\text{H}$  NMR ( $\text{CDCl}_3$ , 400 MHz)  $\delta$  7.52 (d,  $J = 8$  Hz, 1H), 7.37-7.43 (m, 5H), 7.29 (d,  $J = 8$  Hz, 1H), 7.24 (d, 5H), 7.17 (s, 1H), 1.31 (s, 9H).  $^{13}\text{C}$  NMR ( $\text{CDCl}_3$ , 100 MHz)  $\delta$  198.2, 157.7, 155.2, 145.4, 133.0, 132.9, 131.0, 130.0, 129.2, 128.8, 129.2, 128.8, 128.6, 128.4, 128.1, 127.7, 125.3, 122.9, 119.0, 35.5, 31.1. HRMS (EI-TOF) calcd for  $\text{C}_{25}\text{H}_{22}\text{O}$  ( $\text{M}^+$ ): 338.1671, found: 338.1671.

5-(diethylamino)-2,3-diphenyl-1H-inden-1-one (eluent: PE  $\rightarrow$  PE/EA = 100/1)

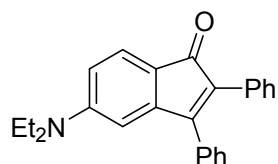

**3ga**

Yield: 25%; Purple solid;  $^1\text{H}$  NMR ( $\text{CDCl}_3$ , 400 MHz)  $\delta$  7.48 (d,  $J = 8$  Hz, 1H), 7.33-7.40 (m, 5H), 7.22-7.26 (m, 5H), 6.43 (d,  $J = 2.4$  Hz, 1H), 6.34 (dd,  $J = 8$  Hz, 1H), 3.40 (q,  $J = 8$  Hz, 4H), 1.18 (t,  $J = 8$  Hz, 6H).  $^{13}\text{C}$  NMR ( $\text{CDCl}_3$ , 100 MHz)  $\delta$  194.5, 152.1, 151.7, 148.6, 134.4, 133.3, 131.5, 130.1, 128.7, 128.7, 127.9, 127.4, 125.7, 117.1, 107.5, 106.3, 45.0, 12.6. HRMS (EI-TOF) calcd for  $\text{C}_{25}\text{H}_{23}\text{NO}$  ( $\text{M}^+$ ): 353.1780, found: 353.1781.

2,3,5-triphenyl-1H-inden-1-one(eluent: PE  $\rightarrow$  PE/EA = 200/1)

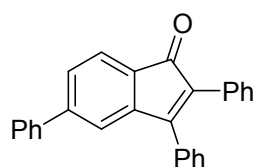

**3ha**

Yield: 75%; Red solid;  $^1\text{H}$  NMR ( $\text{CDCl}_3$ , 400 MHz)  $\delta$  7.66 (d,  $J = 8$  Hz, 1H), 7.56 (d,  $J = 8$  Hz, 2H), 7.49 (dd,  $J = 8$  Hz, 1H), 7.35-7.45 (m, 9H), 7.25-7.27 (m, 5H).  $^{13}\text{C}$  NMR ( $\text{CDCl}_3$ , 100 MHz)  $\delta$  196.2, 154.9, 146.8, 146.1, 140.4, 133.2, 132.7, 130.8, 130.0, 129.5, 129.3, 128.9, 128.6, 128.3, 128.1, 127.8, 127.6, 127.2, 123.5, 120.5. HRMS (EI-TOF) calcd for  $\text{C}_{27}\text{H}_{18}\text{O}$  ( $\text{M}^+$ ): 358.1358, found: 358.1360.

5-fluoro-2,3-diphenyl-1H-inden-1-one(eluent: PE  $\rightarrow$  PE/EA = 200/1)

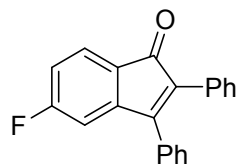

**3ia**

Yield: 50%; Red solid;  $^1\text{H}$  NMR ( $\text{CDCl}_3$ , 400 MHz)  $\delta$  7.57 (q,  $J = 8$  Hz, 1H), 7.42-7.43 (m, 3H), 7.35-7.37 (m, 2H), 6.92 (t,  $J = 8$  Hz, 1H), 6.86 (dd,  $J = 8$  Hz).  $^{13}\text{C}$  NMR ( $\text{CDCl}_3$ , 100 MHz)  $\delta$  194.8, 167.7, 165.2 (d,  $J_{\text{C-F}} = 252$  Hz), 153.2 (d,  $J_{\text{C-F}} = 2$  Hz), 148.7, 148.6 (d,  $J_{\text{C-F}} = 9$  Hz), 133.7, 132.2, 130.4, 130.0, 129.5, 129.0, 128.4, 128.2, 128.1, 126.6, 126.5 (d,  $J_{\text{C-F}} = 4$  Hz), 124.9, 124.8 (d,  $J_{\text{C-F}} = 9$  Hz), 114.6, 114.3 (d,  $J_{\text{C-F}}$

$F = 22$  Hz), 110.3, 110.1. HRMS (EI-TOF) calcd for  $C_{21}H_{13}FO$  ( $M^+$ ): 300.0950, found: 300.0955.

5-chloro-2,3-diphenyl-1H-inden-1-one (eluent: PE  $\rightarrow$  PE/EA = 200/1)

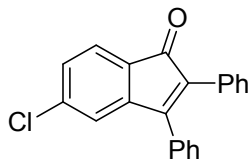

**3ja**

Yield: 46%; Red solid;  $^1H$  NMR ( $CDCl_3$ , 400 MHz)  $\delta$  7.51 (d,  $J = 8$  Hz, 1H), 7.42-7.44 (m, 3H), 7.35-7.37 (m, 2H), 7.62-7.28 (m, 6H), 7.12 (s, 1H).  $^{13}C$  NMR ( $CDCl_3$ , 100 MHz)  $\delta$  195.1, 154.1, 147.3, 139.8, 133.5, 132.1, 130.3, 130.0, 129.6, 129.0, 128.9, 128.6, 128.4, 128.2, 128.1, 123.9, 122.0. HRMS (EI-TOF) calcd for  $C_{21}H_{13}ClO$  ( $M^+$ ): 316.0655, found: 316.0656.

5-iodo-2,3-diphenyl-1H-inden-1-one (eluent: PE  $\rightarrow$  PE/EA = 200/1)

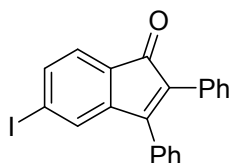

**3ka**

Yield: 40%; Red solid;  $^1H$  NMR ( $CDCl_3$ , 400 MHz)  $\delta$  7.70 (dd,  $J = 8$  Hz, 1H), 7.47-7.47 (m, 1H), 7.43-7.44 (m, 3H), 7.34-7.36 (m, 3H), 7.33 (d,  $J = 24$  Hz, 1H), 7.26 (s, 5H).  $^{13}C$  NMR ( $CDCl_3$ , 100 MHz)  $\delta$  195.6, 154.4, 146.9, 138.0, 133.1, 132.2, 130.2, 130.0, 129.6, 129.0, 128.4, 128.2, 128.1, 124.2, 100.9. HRMS (EI-TOF) calcd for  $C_{21}H_{13}IO$  ( $M^+$ ): 408.0011, found: 408.0014.

2,3-diphenyl-5-(trifluoromethyl)-1H-inden-1-one (eluent: PE  $\rightarrow$  PE/EA = 200/1)

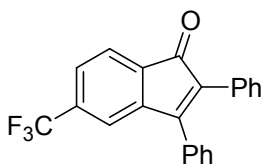

**3la**

Yield: 33%; Red solid;  $^1\text{H}$  NMR ( $\text{CDCl}_3$ , 400 MHz)  $\delta$  7.69 (d,  $J = 8$  Hz, 1H), 7.61 (d,  $J = 8$  Hz, 1H), 7.45-7.47 (m, 3H), 7.36-7.40 (m, 4H), 7.28 (s, 5H).  $^{13}\text{C}$  NMR ( $\text{CDCl}_3$ , 100 MHz)  $\delta$  195.1, 154.7, 146.1, 135.2, 135.0, 133.6, 133.4, 132.0, 131.6, 130.1, 130.0, 129.1, 228.4, 128.2, 126.5 (q,  $J_{\text{CF}_3-\text{C}} = 5$  Hz), 122.8, 117.7 (q,  $J_{\text{C-F}} = 4$  Hz). HRMS (EI-TOF) calcd for  $\text{C}_{22}\text{H}_{13}\text{F}_3\text{O}$  ( $\text{M}^+$ ): 350.0918, found: 350.0922.

methyl 1-oxo-2,3-diphenyl-1H-indene-7-carboxylate (eluent: PE  $\rightarrow$  PE/EA = 100/1)

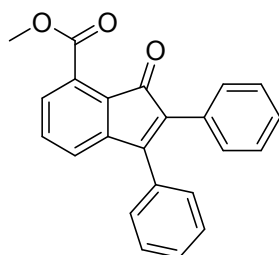

**3ma**

Yield: 21%; Red solid;  $^1\text{H}$  NMR ( $\text{CDCl}_3$ , 400 MHz)  $\delta$  7.36-7.44 (m, 7H), 7.25-7.27 (m, 6H), 3.99 (s, 3H).  $^{13}\text{C}$  NMR ( $\text{CDCl}_3$ , 100 MHz)  $\delta$  193.9, 167.5, 154.3, 145.9, 133.3, 132.7, 132.3, 130.3, 130.0, 129.5, 128.9, 128.4, 128.1, 128.0, 128.0, 123.2, 52.8. HRMS (EI-TOF) calcd for  $\text{C}_{23}\text{H}_{16}\text{O}_3$  ( $\text{M}^+$ ): 340.1099, found: 340.1103.

2,3-diphenyl-1H-cyclopenta[b]naphthalen-1-one (eluent: PE  $\rightarrow$  PE/EA = 100/1)

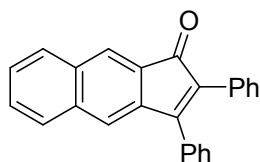

**3na**

Yield: 48%; Yellow solid;  $^1\text{H}$  NMR ( $\text{CDCl}_3$ , 400 MHz)  $\delta$  8.04 (s, 1H), 7.87 (d,  $J = 8$  Hz, 1H), 7.71 (d,  $J = 8$  Hz, 1H), 7.45-7.51 (m, 7H), 7.41 (s, 1H), 7.25-7.32 (m, 5H).  $^{13}\text{C}$  NMR ( $\text{CDCl}_3$ , 100 MHz)  $\delta$  194.8, 156.5, 140.0, 136.6, 136.2, 133.7, 132.9, 130.9, 130.7, 130.3, 130.0, 129.4, 129.2, 128.9, 128.8, 128.7, 128.1, 127.9, 127.2, 124.4, 121.0. HRMS (EI-TOF) calcd for  $\text{C}_{25}\text{H}_{16}\text{O}$  ( $\text{M}^+$ ): 332.1201, found: 332.1202.

2,3-diphenyl-1H-cyclopenta[a]naphthalen-1-one (eluent: PE  $\rightarrow$  PE/EA = 100/1)



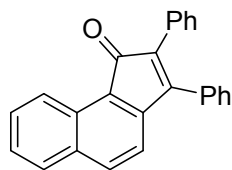

**3oa**

Yield: 56%; Red solid;  $^1\text{H}$  NMR ( $\text{CDCl}_3$ , 400 MHz)  $\delta$  8.81 (d,  $J = 8$  Hz, 1H), 7.87 (d,  $J = 8$  Hz, 1H), 7.74 (d,  $J = 8$  Hz, 1H), 7.54 (t,  $J = 8$  Hz, 1H), 7.43 (s, 5H), 7.37 (t,  $J = 8$  Hz, 1H), 7.25-7.33 (m, 6H).  $^{13}\text{C}$  NMR ( $\text{CDCl}_3$ , 100 MHz)  $\delta$  198.6, 153.8, 146.7, 134.7, 134.2, 132.8, 131.2, 130.8, 130.1, 129.4, 129.4, 129.2, 128.9, 128.6, 128.5, 128.1, 127.7, 126.0, 123.9, 122.3, 119.3. HRMS (EI-TOF) calcd for  $\text{C}_{25}\text{H}_{16}\text{O}$  ( $\text{M}^+$ ): 332.1201, found: 332.1201.

5,7-dimethyl-2,3-diphenyl-1H-inden-1-one(eluent: PE $\rightarrow$ PE/EA = 200/1)

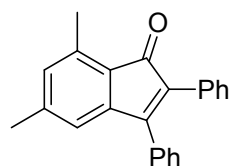

**3pa**

Yield: 60%; Red solid;  $^1\text{H}$  NMR ( $\text{CDCl}_3$ , 400 MHz)  $\delta$  7.33-7.41 (m, 5H), 7.24 (s, 5H), 6.85 (s, 1H), 6.76 (s, 1H), 2.57 (s, 3H), 2.30 (s, 3H).  $^{13}\text{C}$  NMR ( $\text{CDCl}_3$ , 100 MHz)  $\delta$  197.3, 153.9, 146.2, 143.4, 138.0, 133.1, 132.8, 132.1, 131.1, 130.1, 128.9, 128.7, 128.6, 128.0, 127.5, 124.8, 120.6, 21.9, 17.3. HRMS (EI-TOF) calcd for  $\text{C}_{23}\text{H}_{18}\text{O}$  ( $\text{M}^+$ ): 310.1358, found: 310.1358.

6,7-dimethyl-2,3-diphenyl-1H-inden-1-one(eluent: PE $\rightarrow$ PE/EA = 200/1)

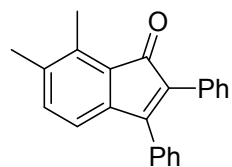

**3qa**

Yield: 62%; Red solid;  $^1\text{H}$  NMR ( $\text{CDCl}_3$ , 400 MHz)  $\delta$  7.34-7.40 (m, 5H), 7.24 (s, 5H), 7.09 (d,  $J = 8$  Hz, 1H), 6.86 (d,  $J = 8$  Hz, 1H), 2.58 (s, 3H), 2.29 (s, 3H).  $^{13}\text{C}$  NMR ( $\text{CDCl}_3$ , 100 MHz)  $\delta$  198.0, 154.4, 143.4, 139.7, 137.7, 133.1, 132.0, 131.2, 130.0, 129.0, 128.7, 128.6, 128.0, 127.4, 127.3, 119.0, 19.4, 13.0. HRMS (EI-TOF) calcd for

$C_{23}H_{18}O$  ( $M^+$ ): 310.1358, found: 310.1360.

5-chloro-7-methoxy-2,3-diphenyl-1H-inden-1-one (eluent: PE  $\rightarrow$  PE/EA = 100/1)

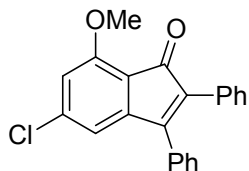

**3ra**

Yield: 54%; Red solid;  $^1H$  NMR ( $CDCl_3$ , 400 MHz)  $\delta$  7.40-7.42 (m, 3H), 7.31-7.33 (m, 2H), 7.24 (s, 5H), 6.89 (d,  $J = 0.8$  Hz, 1H), 6.73 (d,  $J = 0.8$  Hz, 1H), 3.99 (s, 3H).  $^{13}C$  NMR ( $CDCl_3$ , 100 MHz)  $\delta$  192.8, 156.5, 151.4, 148.8, 140.8, 133.0, 131.8, 129.9, 129.7, 128.7, 128.4, 128.1, 127.5, 127.4, 115.1, 113.7, 113.3, 56.0. HRMS (EI-TOF) calcd for  $C_{22}H_{15}ClO_2$  ( $M^+$ ): 346.0761, found: 346.0765.

5,7-dimethoxy-2,3-diphenyl-1H-inden-1-one (eluent: PE  $\rightarrow$  PE/EA = 100/1)

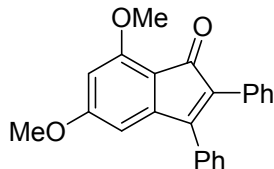

**3sa**

Yield: 65%; Red solid;  $^1H$  NMR ( $CDCl_3$ , 400 MHz)  $\delta$  7.38-7.39 (m, 3H), 7.31-7.33 (m, 2H), 7.21-7.26 (m, 5H), 6.34 (d,  $J = 4$  Hz, 1H), 6.23 (d,  $J = 4$  Hz, 1H), 4.00 (s, 3H), 3.83 (s, 3H).  $^{13}C$  NMR ( $CDCl_3$ , 100 MHz)  $\delta$  192.9, 166.3, 158.7, 151.0, 149.8, 134.0, 133.0, 131.0, 130.2, 128.8, 128.7, 127.9, 127.6, 108.9, 103.8, 97.1, 56.2, 55.8. HRMS (EI-TOF) calcd for  $C_{23}H_{18}O_3$  ( $M^+$ ): 342.1256, found: 342.1258.

2,3-di-p-tolyl-1H-inden-1-one (eluent: PE  $\rightarrow$  PE/EA = 200/1)

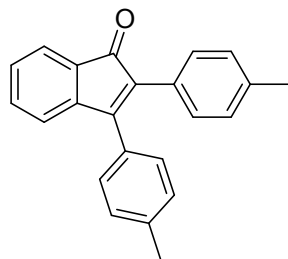

**3ab**

Yield: 72%; Red solid;  $^1\text{H NMR}$  ( $\text{CDCl}_3$ , 400 MHz)  $\delta$  7.56 (d,  $J = 8$  Hz, 1H), 7.36 (t,  $J = 8$  Hz, 1H), 7.14-7.30 (m, 8H), 7.08 (d,  $J = 8$  Hz, 2H), 2.40 (s, 3H), 2.32 (s, 3H).  $^{13}\text{C NMR}$  ( $\text{CDCl}_3$ , 100 MHz)  $\delta$  196.8, 154.8, 145.4, 139.4, 137.6, 133.3, 132.1, 130.9, 129.9, 129.5, 128.9, 128.7, 128.5, 128.0, 122.8, 121.2, 21.6, 21.4. HRMS (EI-TOF) calcd for  $\text{C}_{23}\text{H}_{18}\text{O}$  ( $\text{M}^+$ ): 310.1358, found: 310.1359.

2,3-bis(4-methoxyphenyl)-1H-inden-1-one (eluent: PE  $\rightarrow$  PE/EA = 100/1)

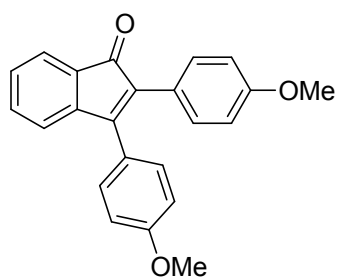

**3ac**

Yield: 44%; Red solid;  $^1\text{H NMR}$  ( $\text{CDCl}_3$ , 400 MHz)  $\delta$  7.55 (d,  $J = 8$  Hz, 1H), 7.34-7.37 (m, 3H), 7.23-7.26 (m, 3H), 7.17 (d,  $J = 8$  Hz, 1H), 6.94 (d,  $J = 8$  Hz, 2H), 6.82 (d,  $J = 8$  Hz, 2H), 3.86 (s, 3H), 3.80 (s, 3H).  $^{13}\text{C NMR}$  ( $\text{CDCl}_3$ , 100 MHz)  $\delta$  197.0, 160.3, 159.1, 153.8, 145.5, 133.3, 131.3, 131.0, 130.2, 128.6, 125.1, 123.4, 122.7, 121.0, 114.2, 113.7, 55.3, 55.2. HRMS (EI-TOF) calcd for  $\text{C}_{23}\text{H}_{18}\text{O}_3$  ( $\text{M}^+$ ): 342.1256, found: 342.1258.

2,3-bis(4-fluorophenyl)-1H-inden-1-one (eluent: PE  $\rightarrow$  PE/EA = 200/1)

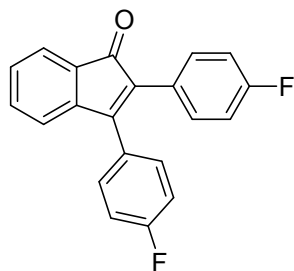

**3ad**

Yield: 56%; Red solid;  $^1\text{H}$  NMR ( $\text{CDCl}_3$ , 400 MHz)  $\delta$  7.58 (d,  $J = 8$  Hz, 1H), 7.35-7.41 (m, 3H), 7.30 (t,  $J = 8$  Hz, 1H), 7.21-7.26 (m, 2H), 7.13 (t,  $J = 8$  Hz, 3H), 6.97 (t,  $J = 8$  Hz, 2H).  $^{13}\text{C}$  NMR ( $\text{CDCl}_3$ , 100 MHz)  $\delta$  196.2, 163.2 (d,  $J_{\text{C-F}} = 249$  Hz), 162.5 (d,  $J_{\text{C-F}} = 267$  Hz), 154.2, 144.9, 133.6, 131.7 (d,  $J_{\text{C-F}} = 8$  Hz), 131.5, 130.5 (d,  $J_{\text{C-F}} = 8$  Hz), 130.5, 129.2, 128.5 (d,  $J_{\text{C-F}} = 3$  Hz), 126.5 (d,  $J_{\text{C-F}} = 4$  Hz), 123.2, 121.1, 116.2 (d,  $J_{\text{C-F}} = 21$  Hz), 115.4 (d,  $J_{\text{C-F}} = 21$  Hz). HRMS (EI-TOF) calcd for  $\text{C}_{21}\text{H}_{12}\text{F}_2\text{O}$  ( $\text{M}^+$ ): 318.0856, found: 318.0851.

2,3-bis(4-chlorophenyl)-1H-inden-1-one (eluent: PE  $\rightarrow$  PE/EA = 200/1)

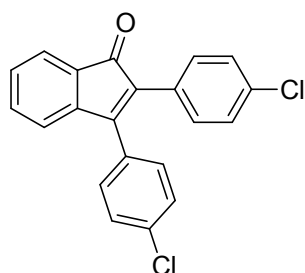

**3ae**

Yield: 58%; Red solid;  $^1\text{H}$  NMR ( $\text{CDCl}_3$ , 400 MHz)  $\delta$  7.59 (d,  $J = 8$  Hz, 1H), 7.38-7.43 (m, 3H), 7.30-7.33 (m, 3H), 7.25-7.27 (m, 2H), 7.18-7.20 (m, 2H), 7.11 (d,  $J = 8$  Hz, 1H).  $^{13}\text{C}$  NMR ( $\text{CDCl}_3$ , 100 MHz)  $\delta$  195.9, 154.3, 144.7, 135.5, 134.0, 133.7, 131.5, 131.2, 130.7, 130.4, 129.9, 129.4, 128.8, 128.5, 123.3, 121.1. HRMS (EI-TOF) calcd for  $\text{C}_{21}\text{H}_{12}\text{Cl}_2\text{O}$  ( $\text{M}^+$ ): 350.0265, found: 350.0269.

2,3-bis(4-bromophenyl)-1H-inden-1-one (eluent: PE  $\rightarrow$  PE/EA = 200/1)

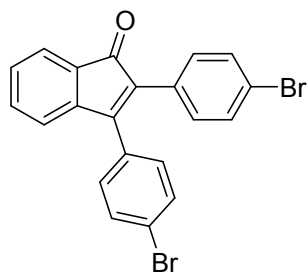

**3af**

Yield: 63%; Red solid;  $^1\text{H}$  NMR ( $\text{CDCl}_3$ , 400 MHz)  $\delta$  7.56-7.58 (m, 3H), 7.37-7.42 (m, 3H), 7.31 (t,  $J = 8$  Hz, 1H), 7.25 (d,  $J = 8$  Hz, 2H), 7.10-7.13 (m, 3H).  $^{13}\text{C}$  NMR ( $\text{CDCl}_3$ , 100 MHz)  $\delta$  195.7, 154.4, 144.6, 133.7, 132.3, 131.5, 131.5, 131.3, 130.5, 130.1, 129.4, 129.3, 123.8, 123.3, 122.4, 121.2. HRMS (EI-TOF) calcd for  $\text{C}_{21}\text{H}_{12}\text{Br}_2\text{O}$  ( $\text{M}^+$ ): 437.9255, found: 437.9255.

2,3-bis(3-fluorophenyl)-1H-inden-1-one (eluent: PE  $\rightarrow$  PE/EA = 200/1)

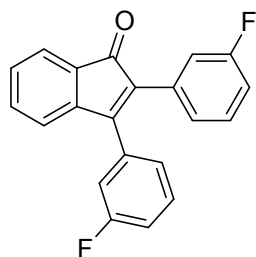

**3ag**

Yield: 54%; Red solid;  $^1\text{H}$  NMR ( $\text{CDCl}_3$ , 400 MHz)  $\delta$  7.53 (d,  $J = 8$  Hz, 1H), 7.33 (t,  $J = 8$  Hz, 2H), 7.25 (t,  $J = 8$  Hz, 2H), 7.12-7.18 (m, 1H), 7.03-7.08 (m, 4H), 6.89-6.95 (m, 3H).  $^{13}\text{C}$  NMR ( $\text{CDCl}_3$ , 100 MHz)  $\delta$  195.7, 162.9 (d,  $J_{\text{C-F}} = 246$  Hz), 162.5 (d,  $J_{\text{C-F}} = 244$  Hz), 154.7, 144.6, 134.5 (d,  $J_{\text{C-F}} = 8$  Hz), 133.8, 132.4 (d,  $J_{\text{C-F}} = 8$  Hz), 131.7 (d,  $J_{\text{C-F}} = 3$  Hz), 130.8 (d,  $J_{\text{C-F}} = 8$  Hz), 130.4, 129.7 (d,  $J_{\text{C-F}} = 8$  Hz), 129.5, 125.7 (d,  $J_{\text{C-F}} = 3$  Hz), 124.3 (d,  $J_{\text{C-F}} = 3$  Hz), 123.4, 121.4, 116.8 (d,  $J_{\text{C-F}} = 17$  Hz), 116.6 (d,  $J_{\text{C-F}} = 17$  Hz), 115.3 (d,  $J_{\text{C-F}} = 33$  Hz), 115.2 (d,  $J_{\text{C-F}} = 33$  Hz). HRMS (EI-TOF) calcd for  $\text{C}_{21}\text{H}_{12}\text{F}_2\text{O}$  ( $\text{M}^+$ ): 318.0856, found: 318.0860.

The mixture of **3ah** and **3ah'** (eluent: PE  $\rightarrow$  PE/EA = 200/1)



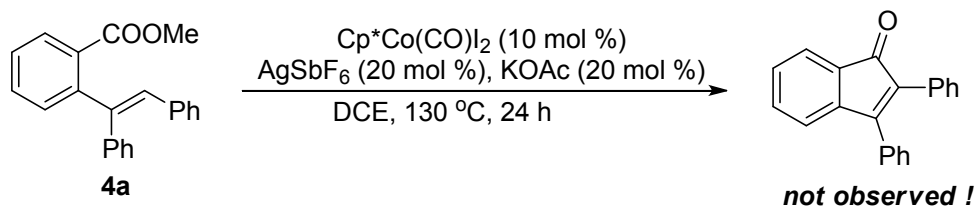

31 mg (0.1 mmol) of the **4a** were dissolved in 1mL DCE in a sealed tube. 5 mg (10 mol%)  $\text{Cp}^*\text{Co}(\text{CO})\text{I}_2$ , 7 mg (20 mol%)  $\text{AgSbF}_6$  and 2 mg (20 mol%) KOAc were added. The tube was stirred at 130 °C for 24 h under  $\text{N}_2$ . The desired product was not observed.

(E)-methyl-2-(1,2-diphenylvinyl)benzoate<sup>3</sup>

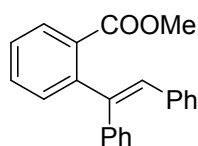

White solid;  $^1\text{H}$  NMR ( $\text{CDCl}_3$ , 400 MHz)  $\delta$  7.69 (d,  $J = 8$  Hz, 1H), 7.44 (t,  $J = 8$  Hz, 1H), 7.35 (t,  $J = 8$  Hz, 2H), 7.13-7.20 (m, 10 H), 3.58 (s, 3H).  $^{13}\text{C}$  NMR ( $\text{CDCl}_3$ , 100 MHz)  $\delta$  169.3, 144.5, 142.3, 139.9, 137.4, 132.0, 132.0, 132.0, 130.5, 129.6, 129.5, 129.4, 128.1, 127.4, 127.4, 126.9, 52.1. HRMS (EI-TOF) calcd for  $\text{C}_{22}\text{H}_{18}\text{O}_2$  ( $\text{M}^+$ ): 314.1307, found: 314.1309.

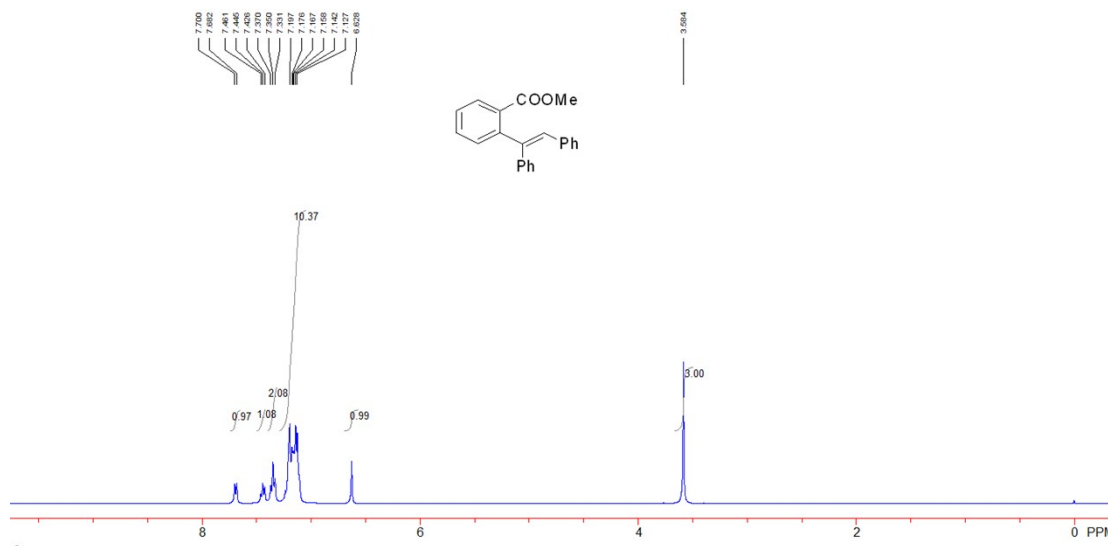

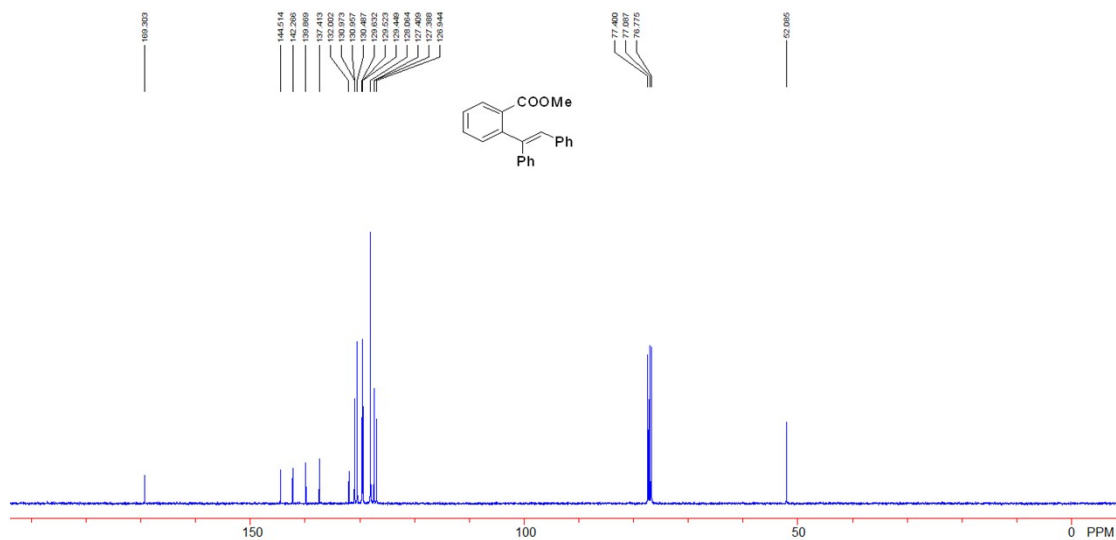

GC-MS

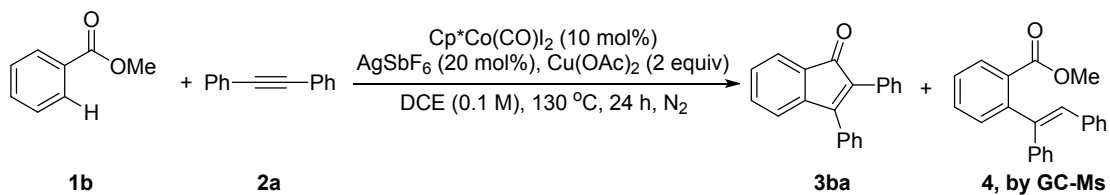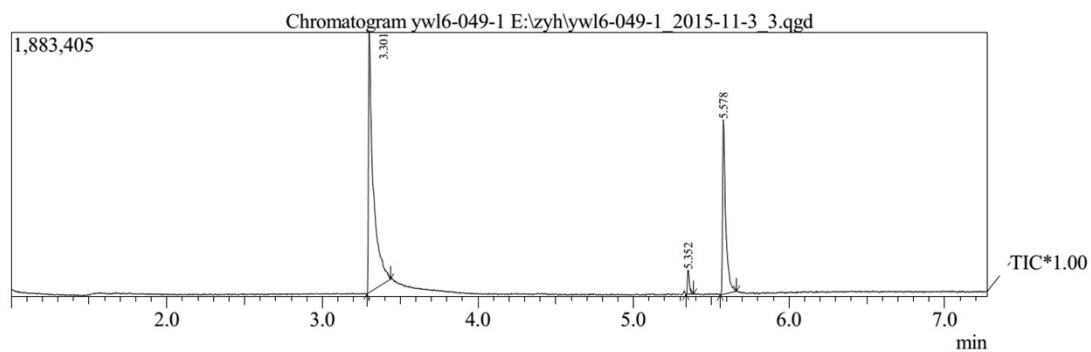

| Peak# | R.Time | I.Time | F.Time | Area    | Area%  | Height  | Height% | A/H  | Mark | Nar |
|-------|--------|--------|--------|---------|--------|---------|---------|------|------|-----|
| 1     | 3.301  | 3.287  | 3.437  | 3991762 | 68.14  | 1851494 | 56.73   | 2.16 |      | Phe |
| 2     | 5.352  | 5.337  | 5.387  | 144868  | 2.47   | 170914  | 5.24    | 0.85 |      | Eth |
| 3     | 5.578  | 5.557  | 5.663  | 1721860 | 29.39  | 1241418 | 38.04   | 1.39 |      | 9-C |
|       |        |        |        | 5858490 | 100.00 | 3263826 | 100.00  |      |      |     |

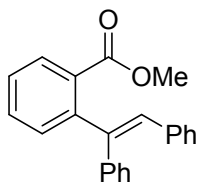

Chemical Formula: C<sub>22</sub>H<sub>18</sub>O<sub>2</sub>

Exact Mass: 314.1307



Line#:2 R.Time:5.350(Scan#:1306) MassPeaks:53  
RawMode:Averaged 5.347-5.353(1305-1307) BasePeak:314.20(21044)  
BG Mode:Calc. from Peak Group 1 - Event 1

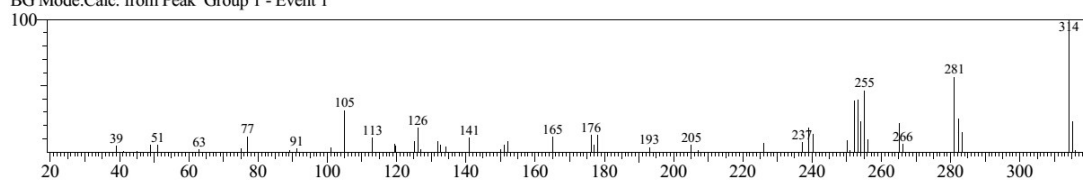

## MALDI-TOF

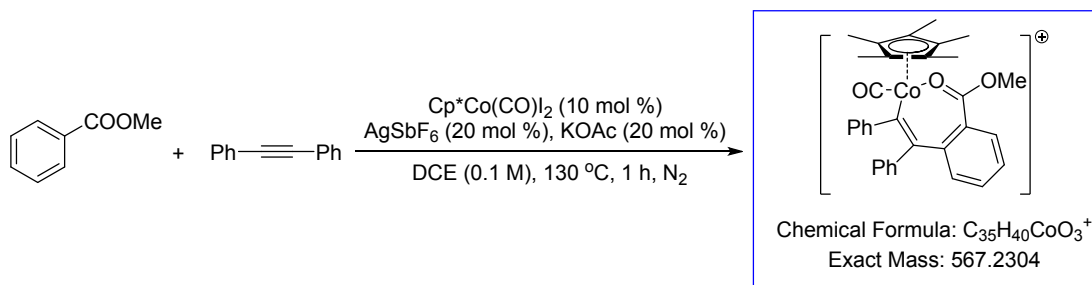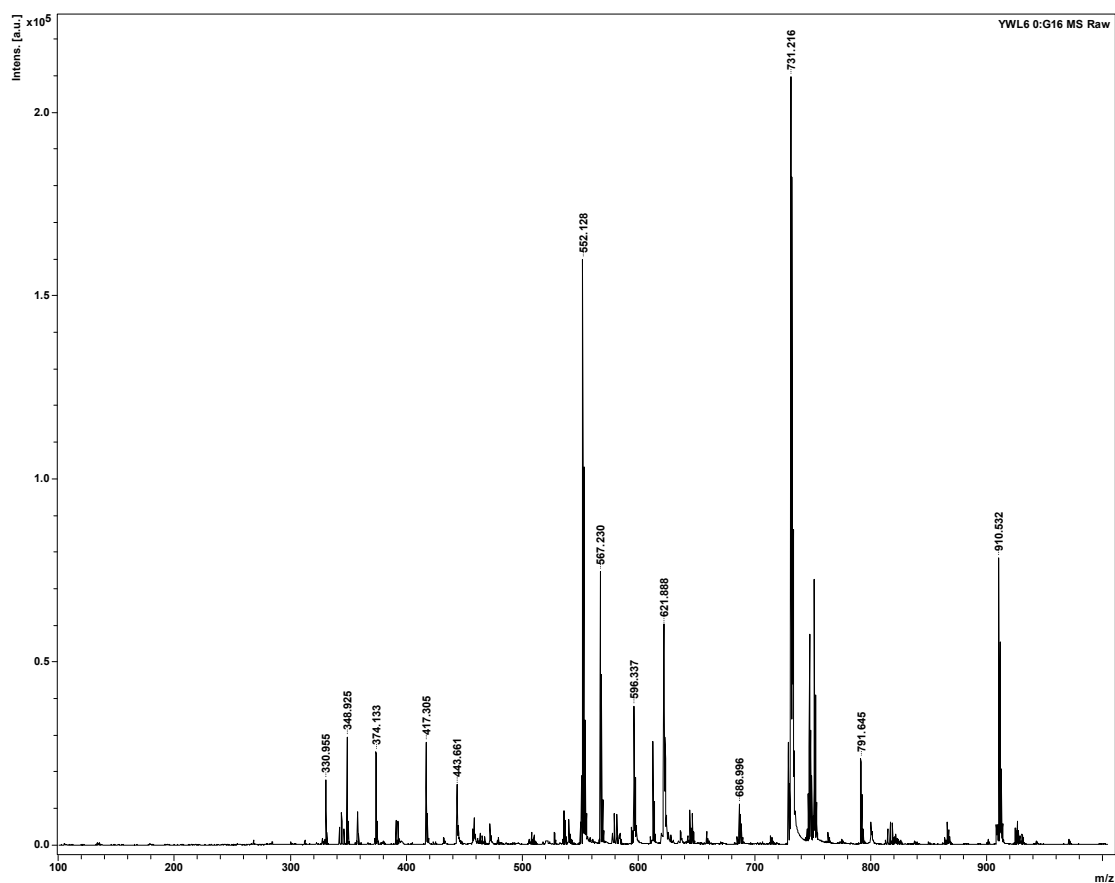

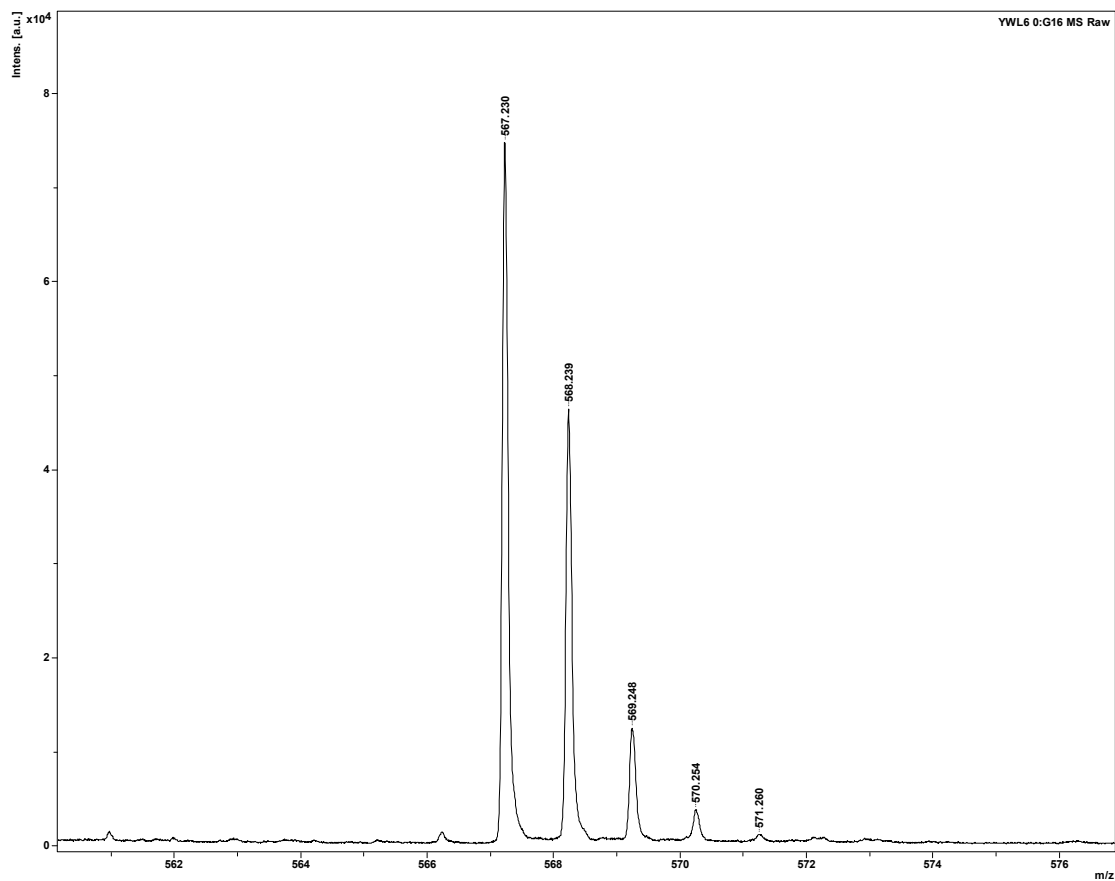

## References

- 1 B. Sun, T. Yoshino, S. Matsunaga and M. Kanai, *Adv. Synth. Catal.*, 2014, **356**, 1491.
- 2 K. Graczyk, W. Ma and L. Ackermann, *Org. Lett.*, 2012, **14**, 4110.
- 3 N. Guimond, C. Gouliaras and K. Fagnou, *J. Am. Chem. Soc.*, 2010, **132**, 6908.

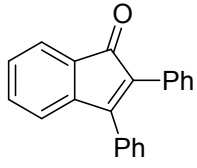

**3ba**

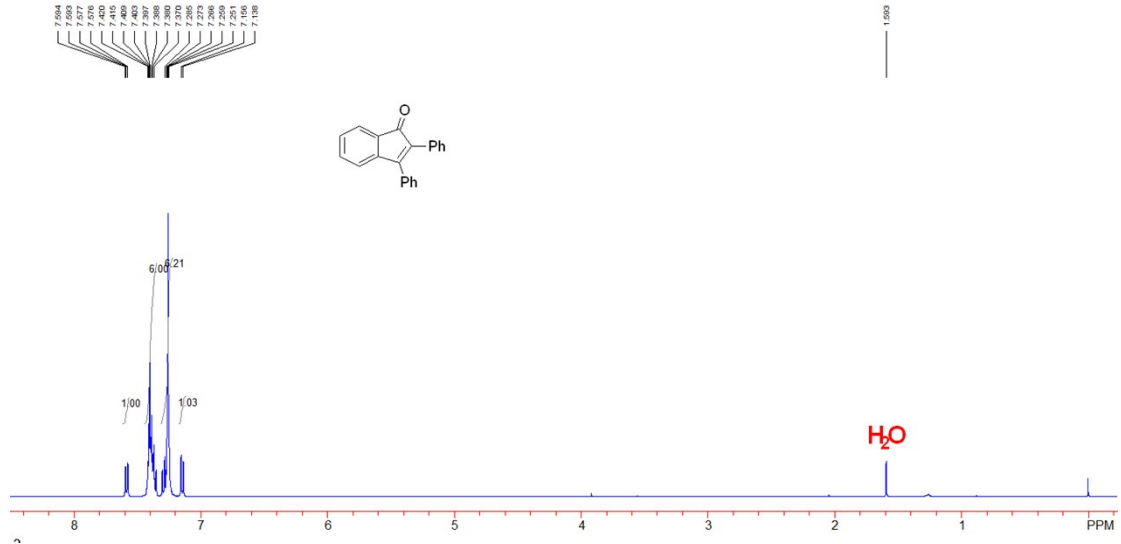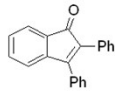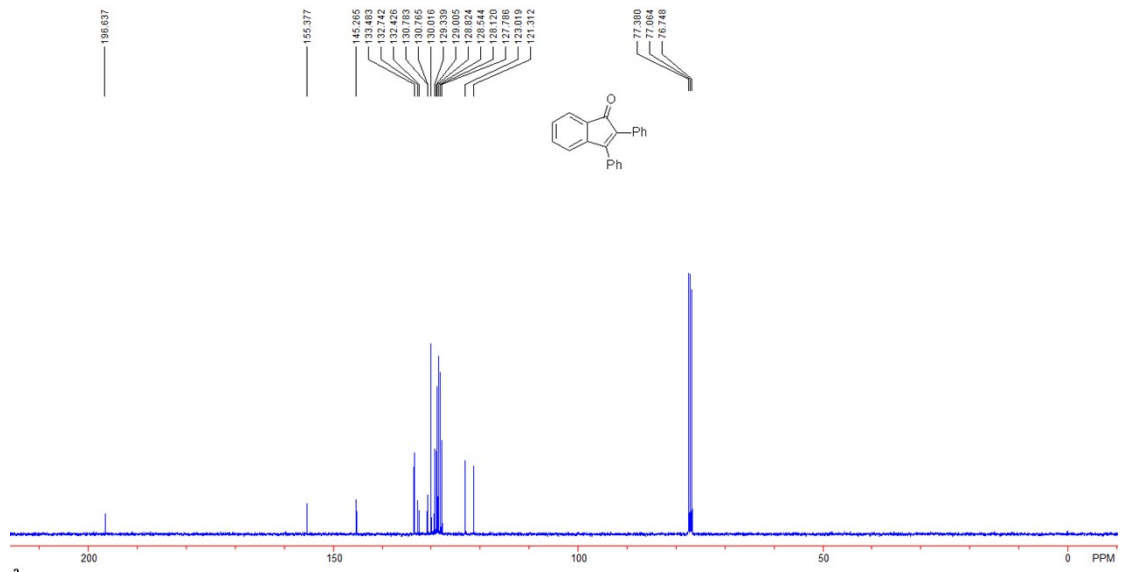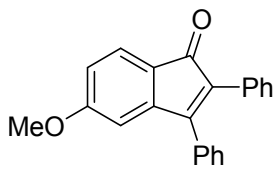

**3aa**

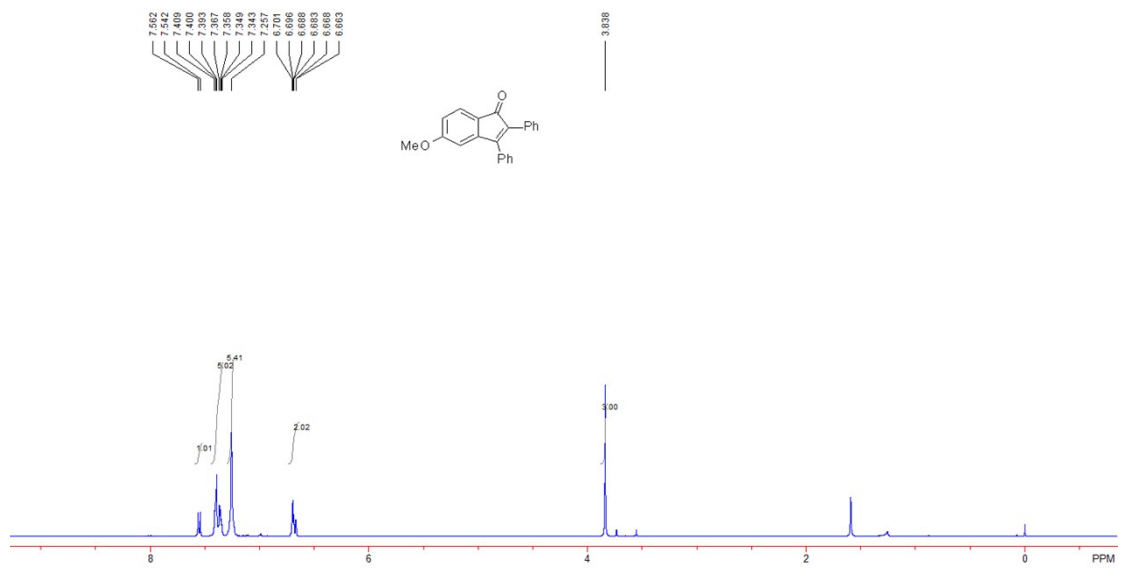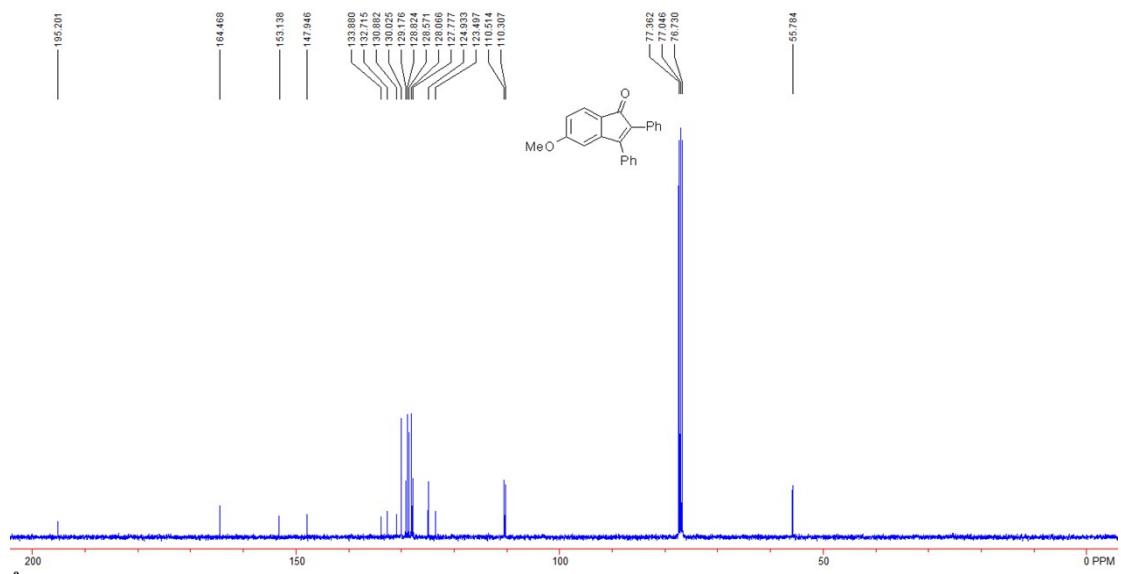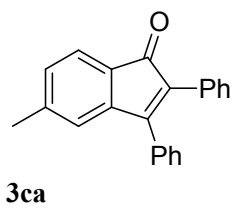

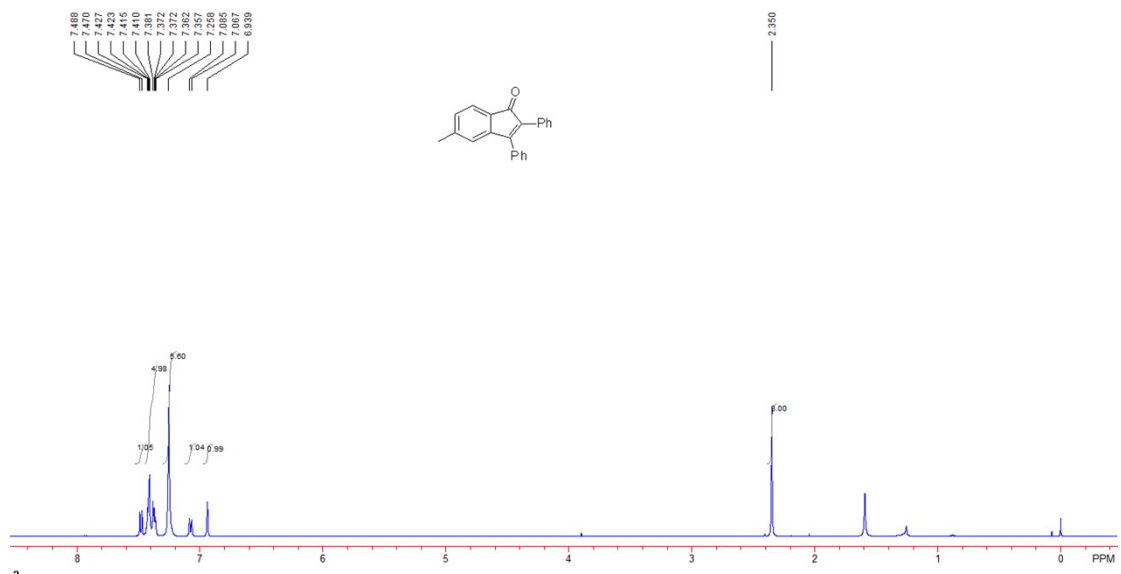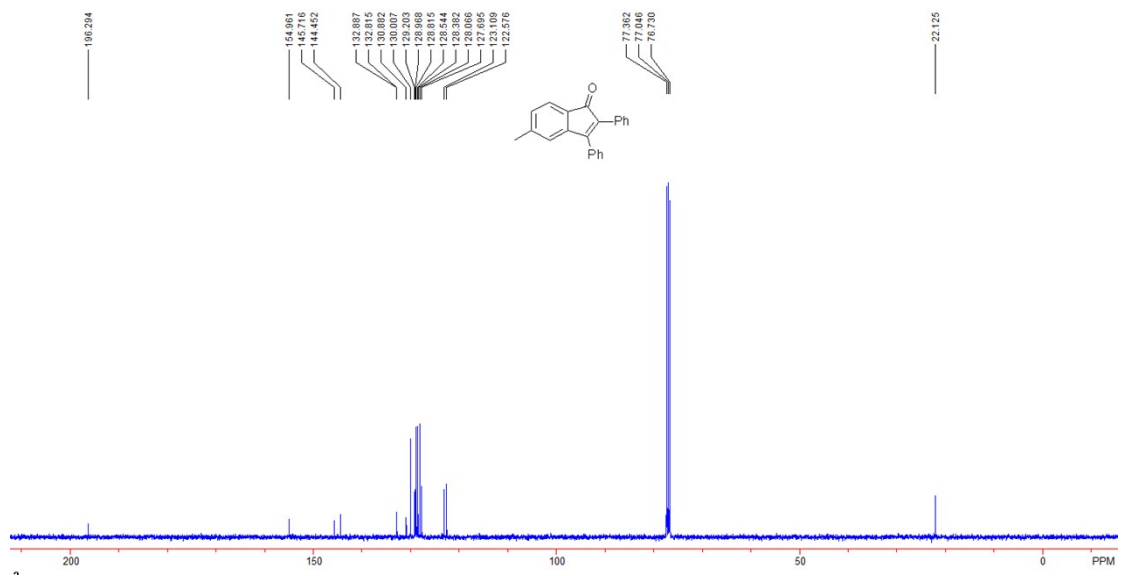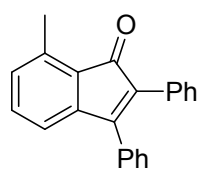

**3da**

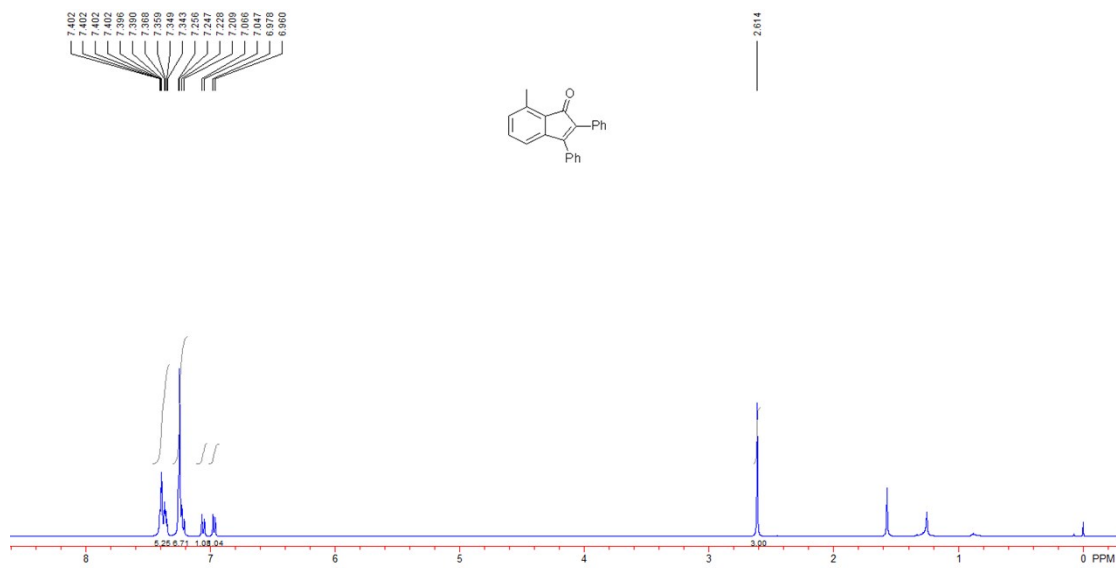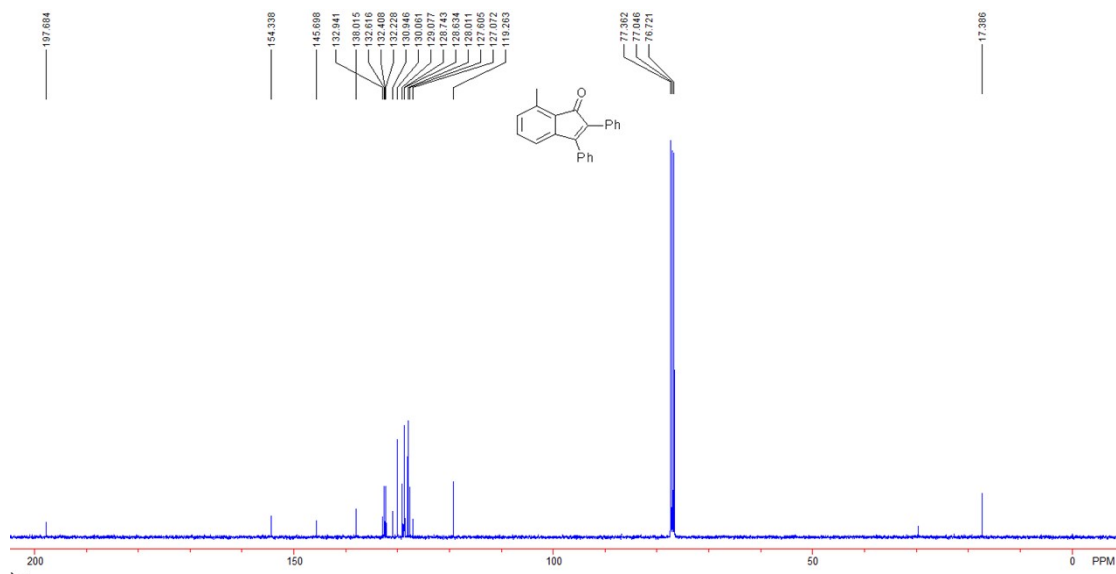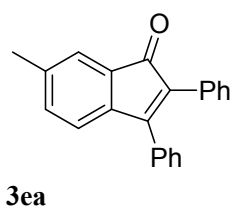

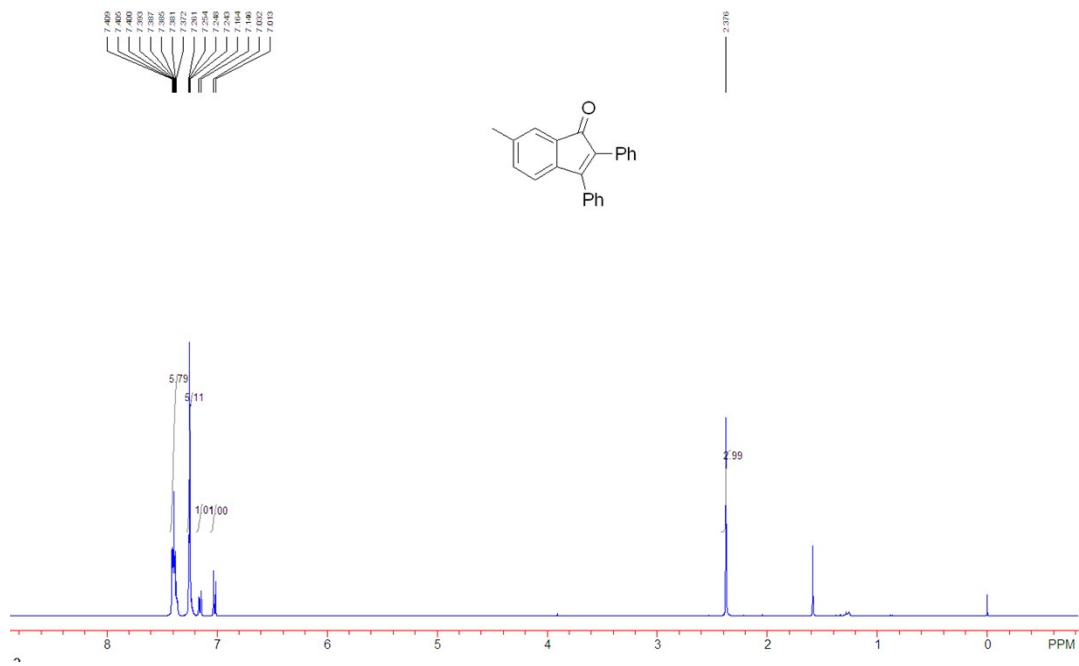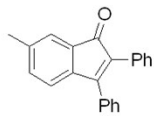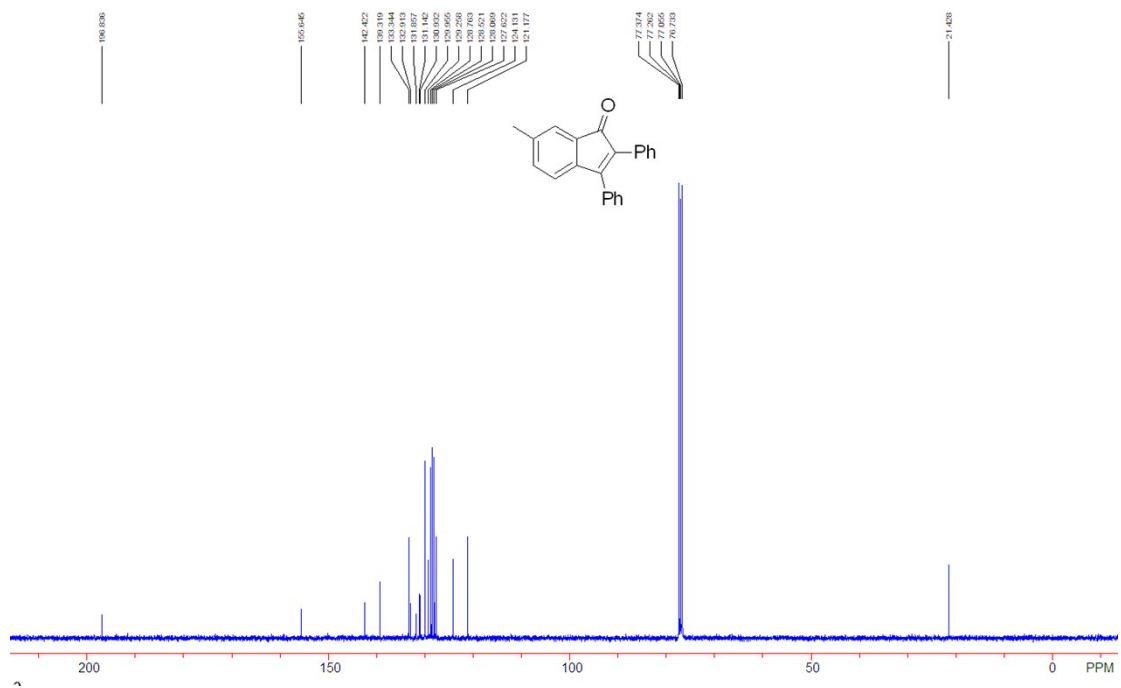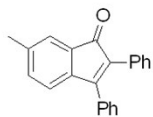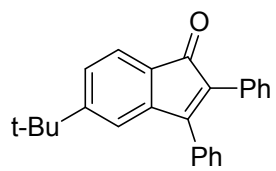

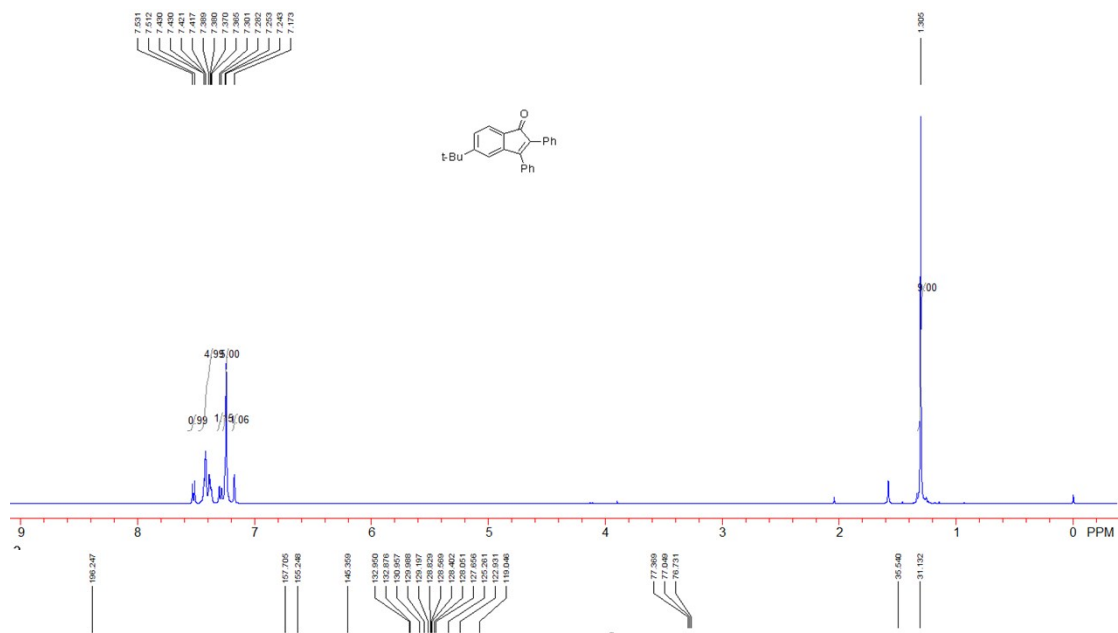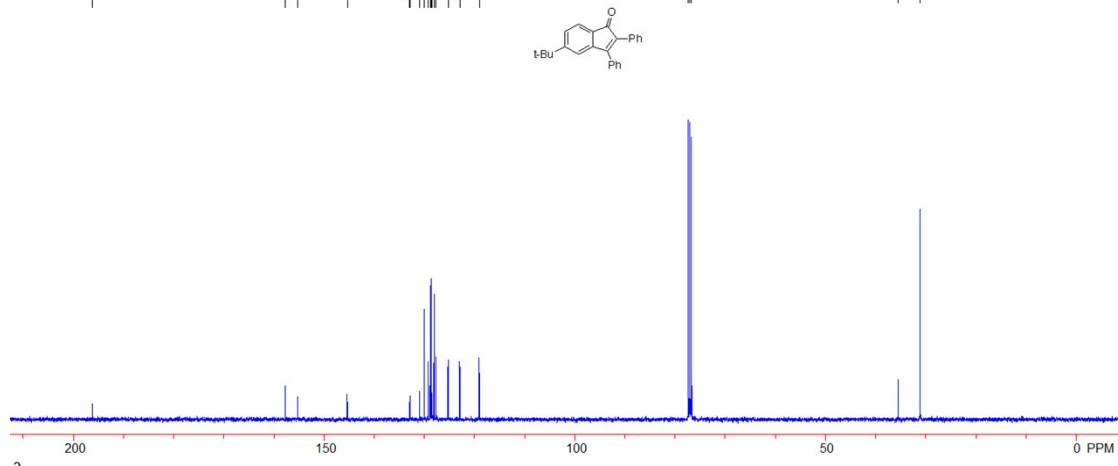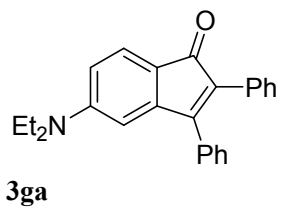



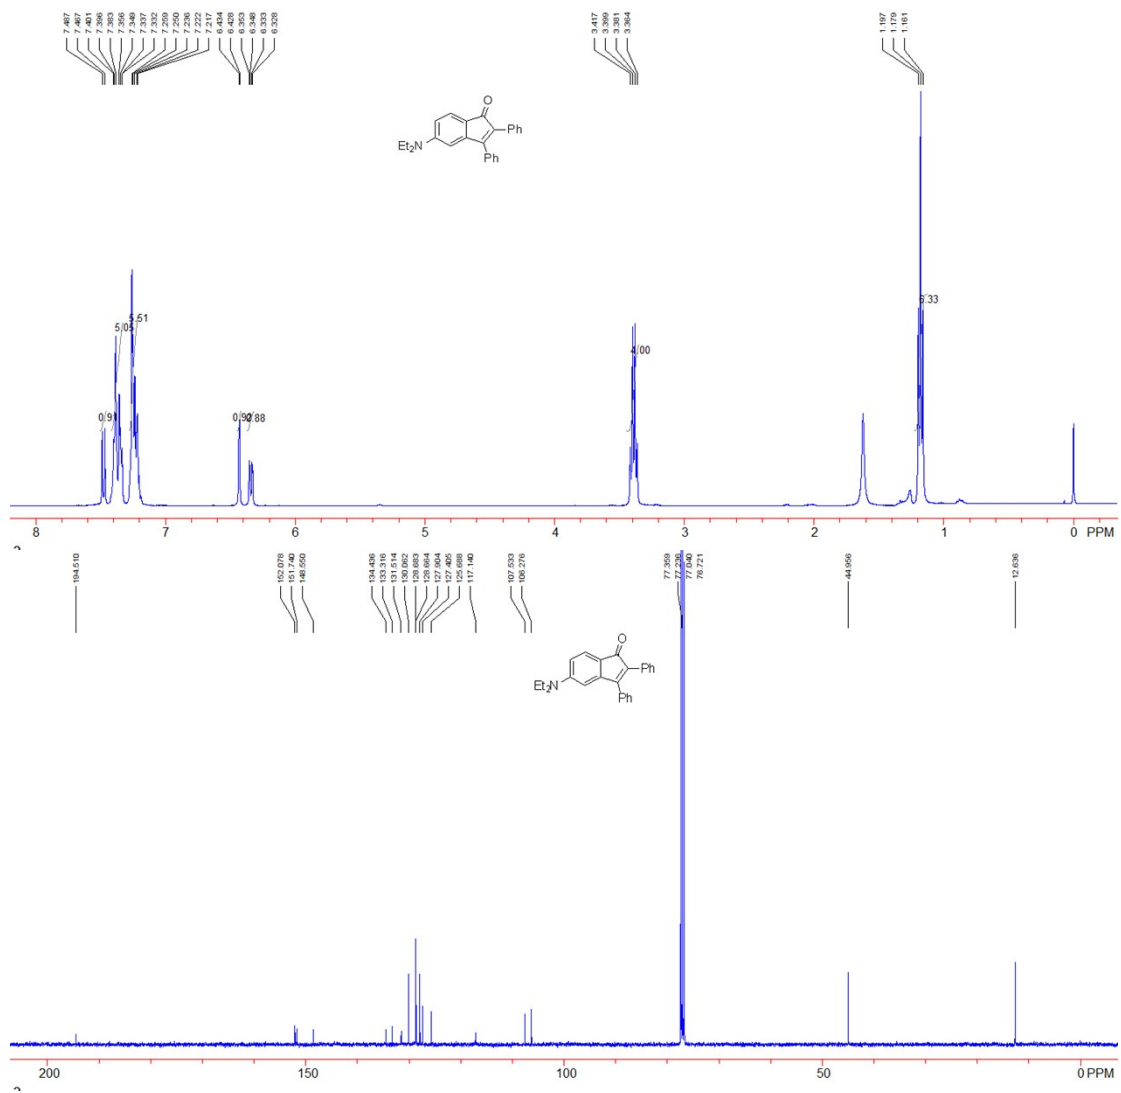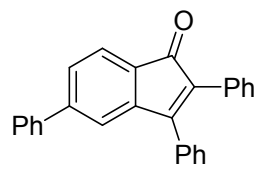

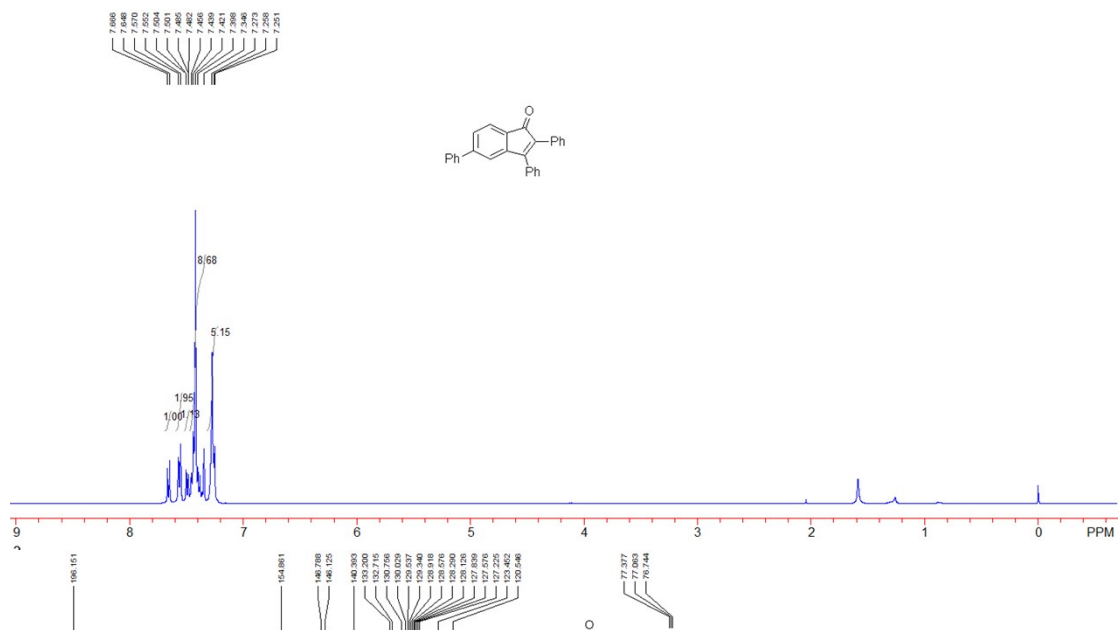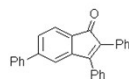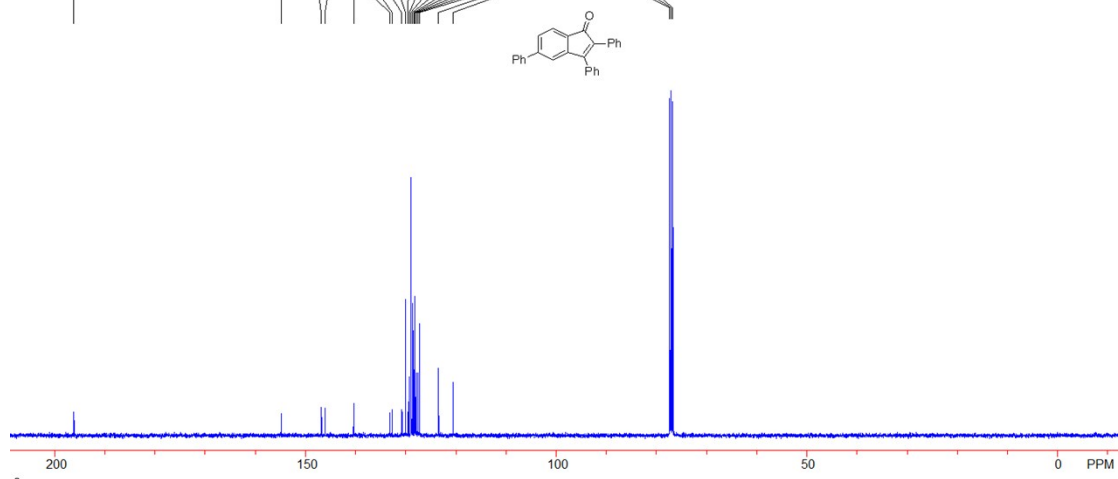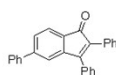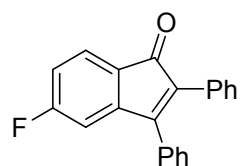

3ia

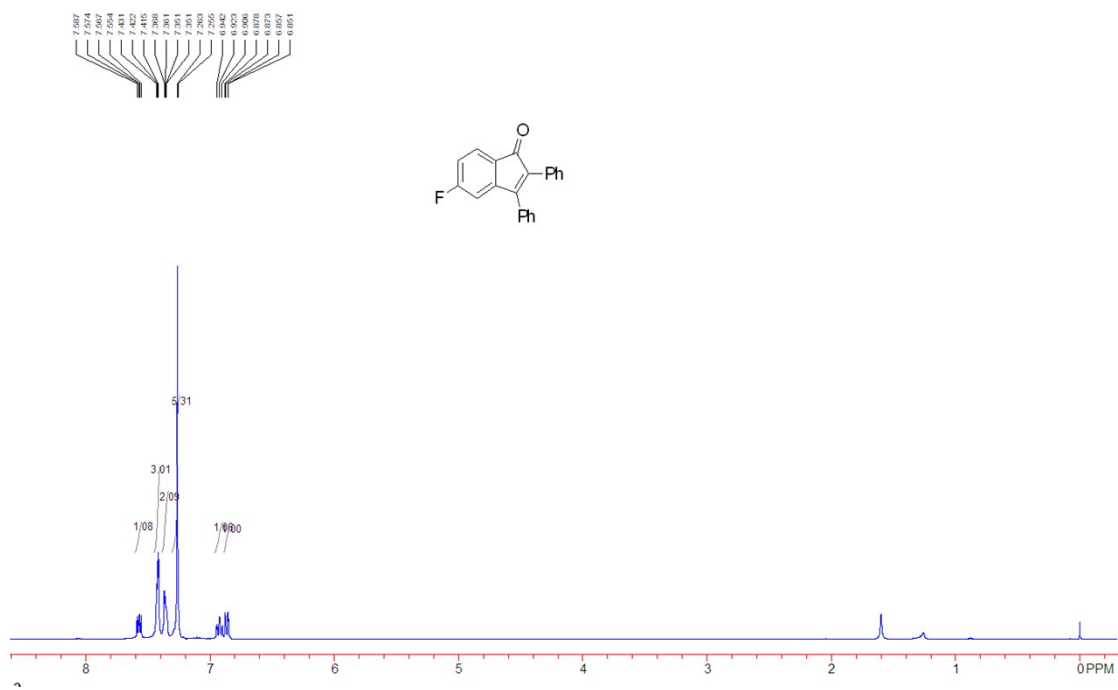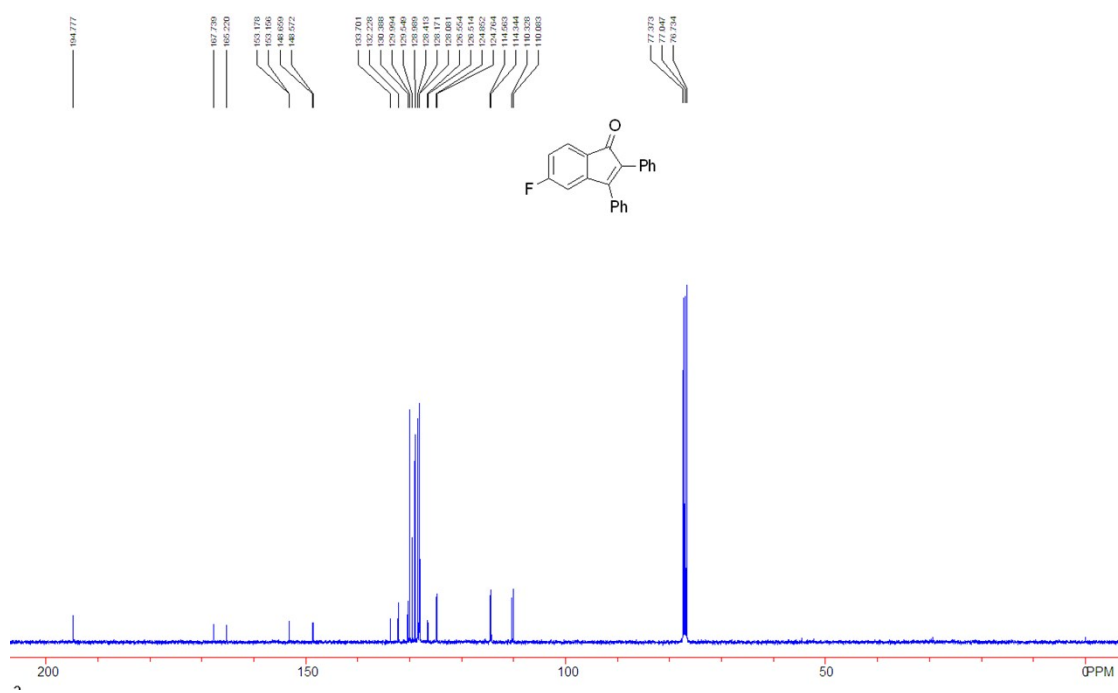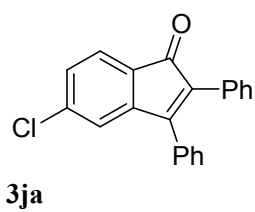

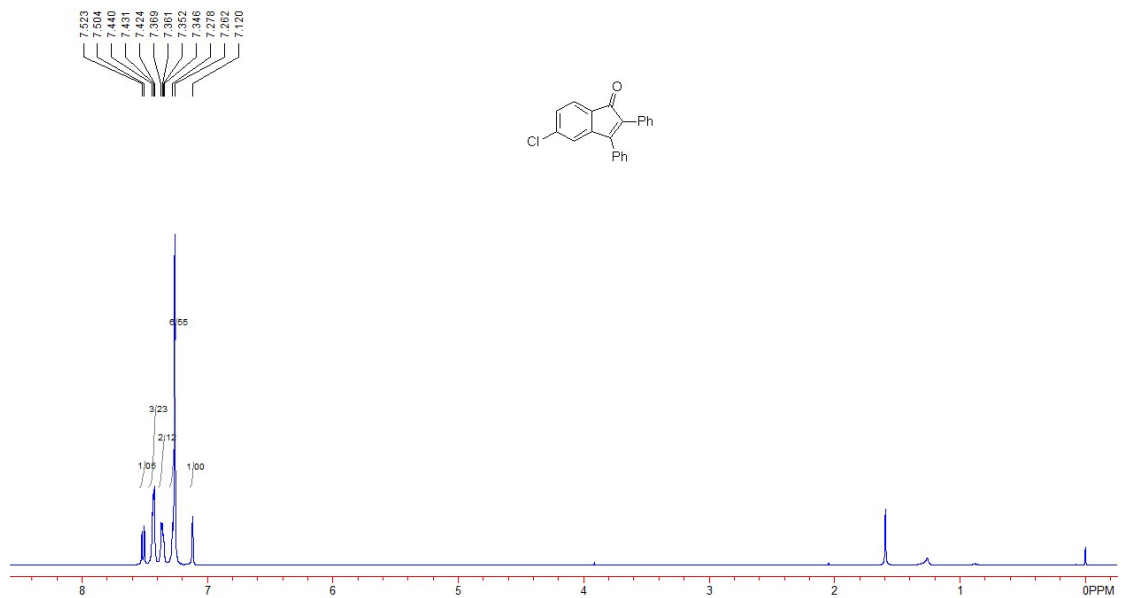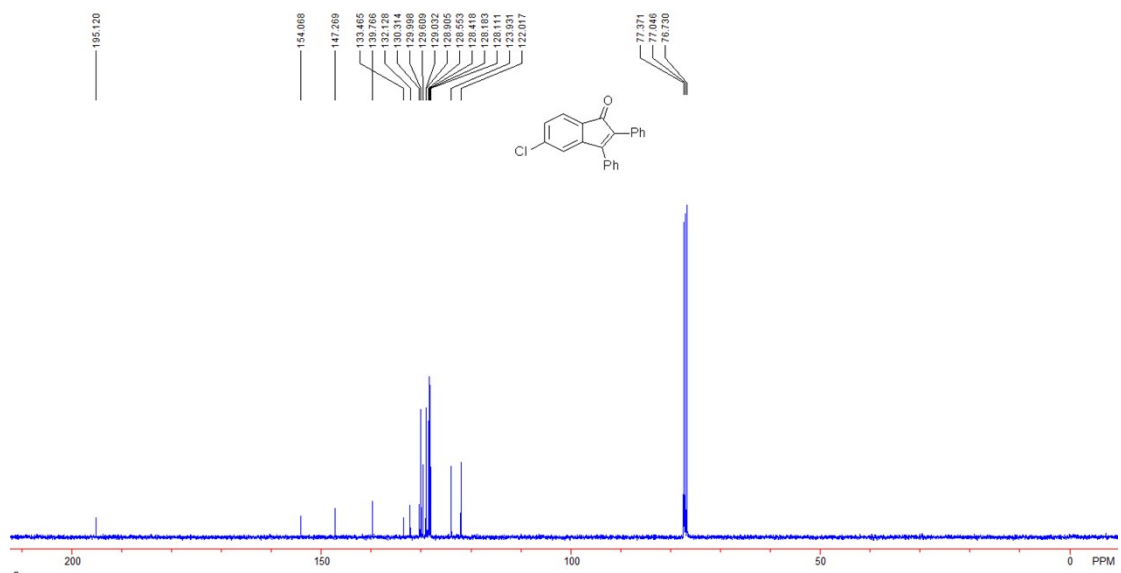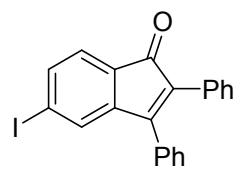

**3ka**

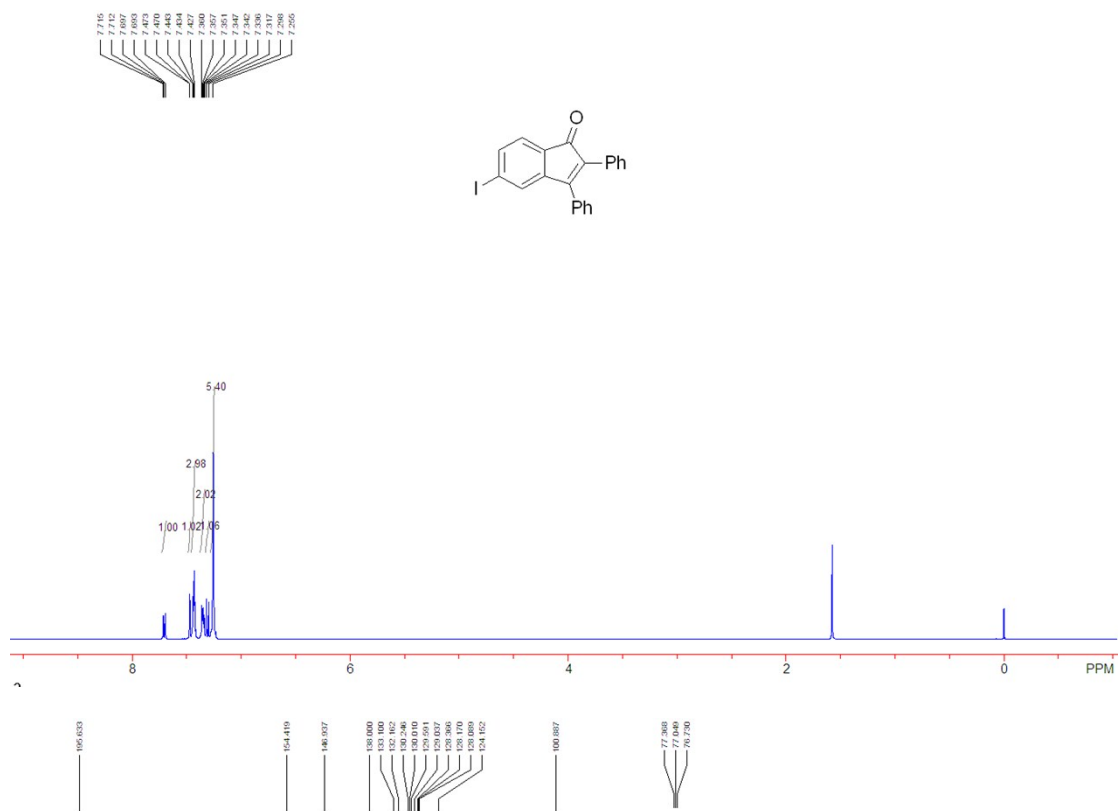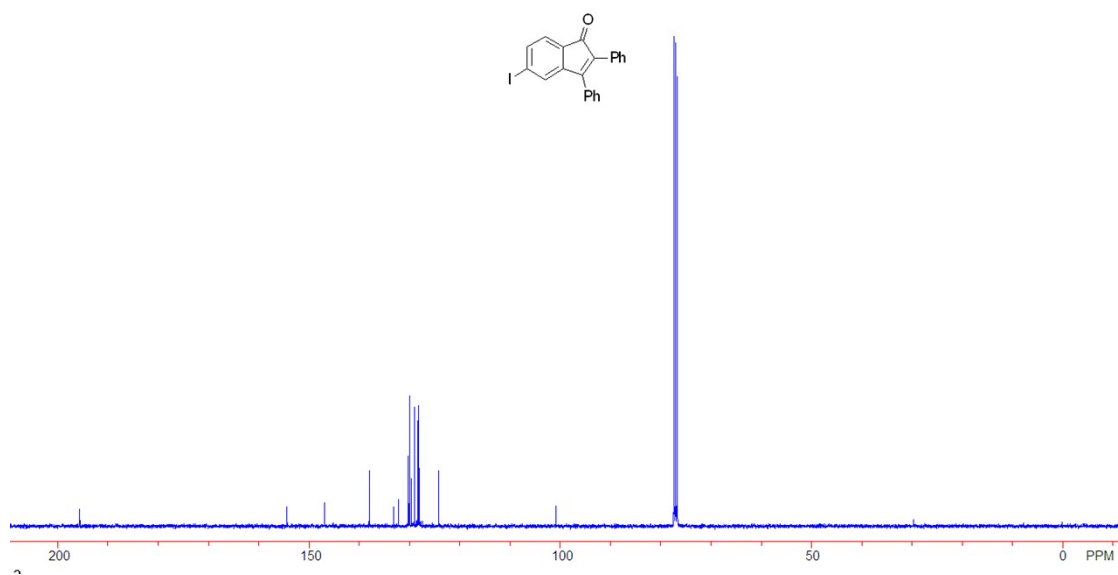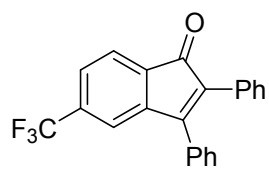

**3la**



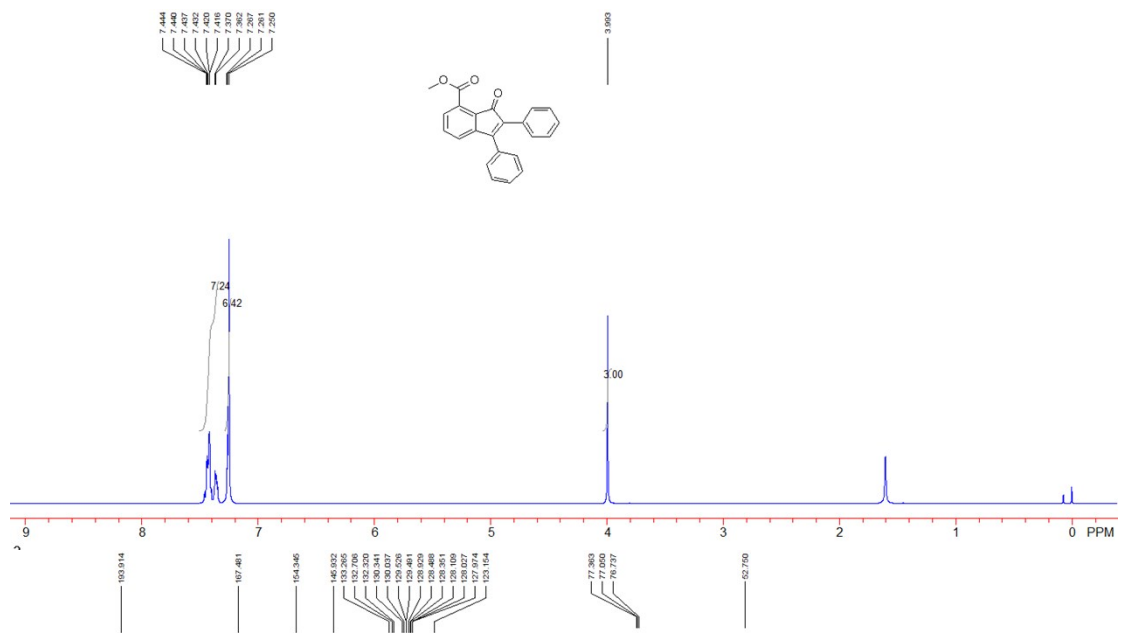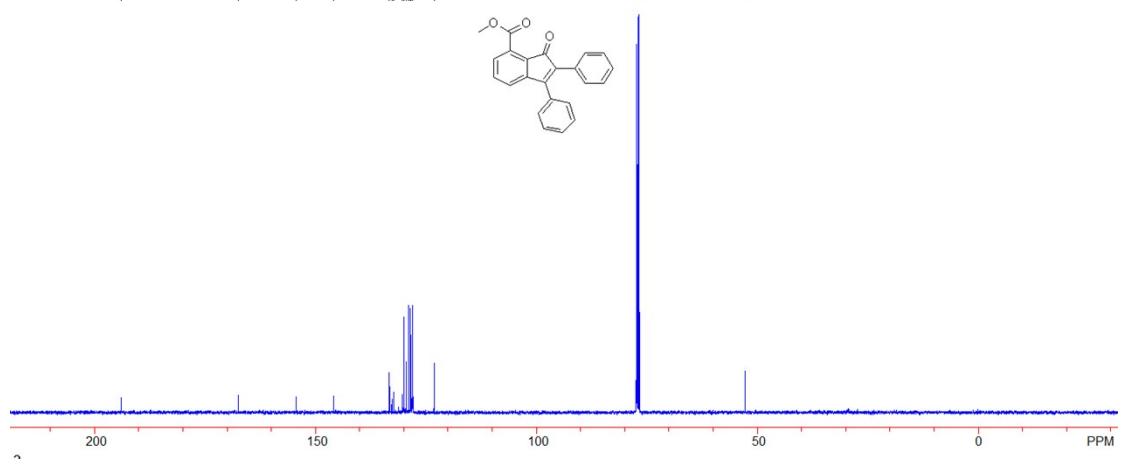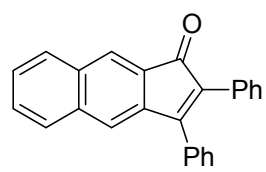

**3na**

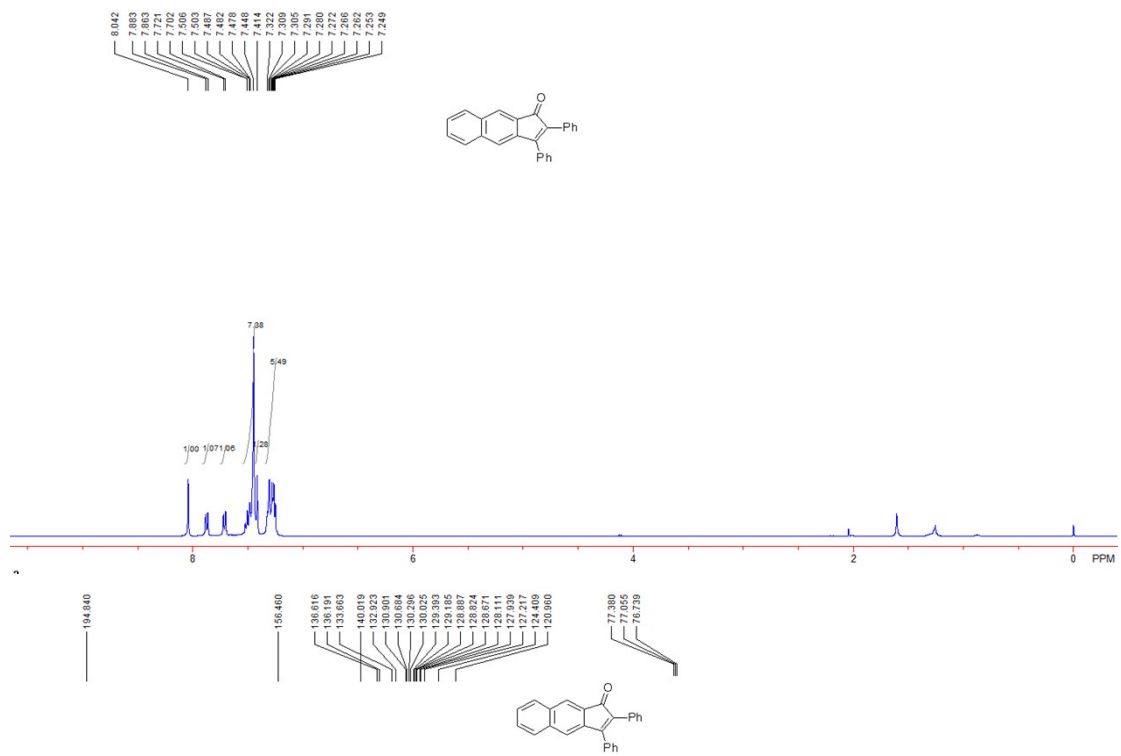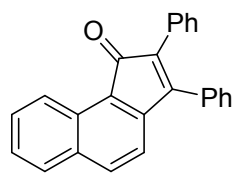

**30a**



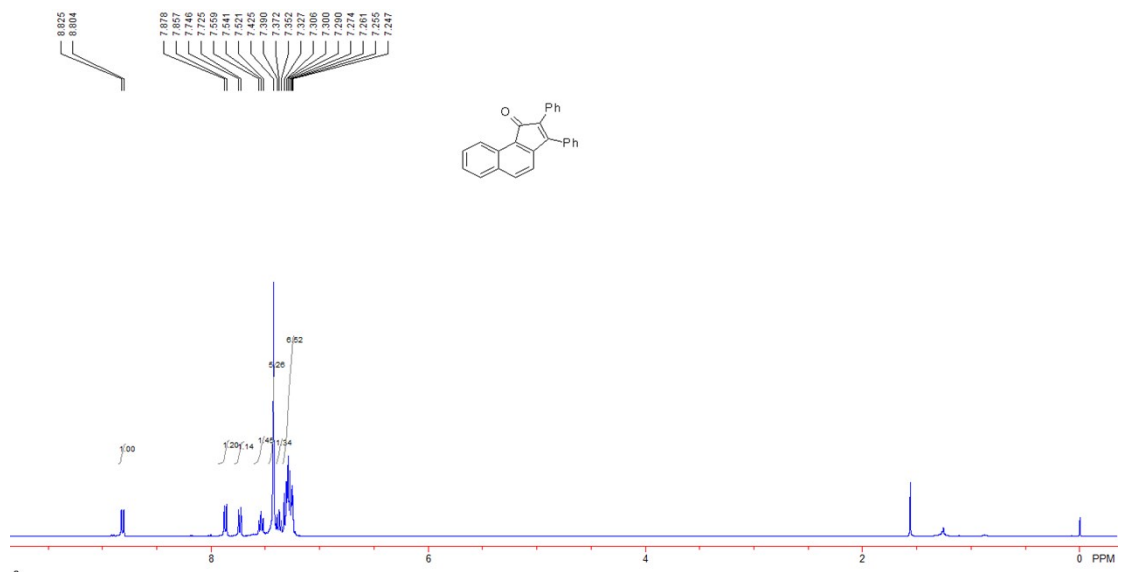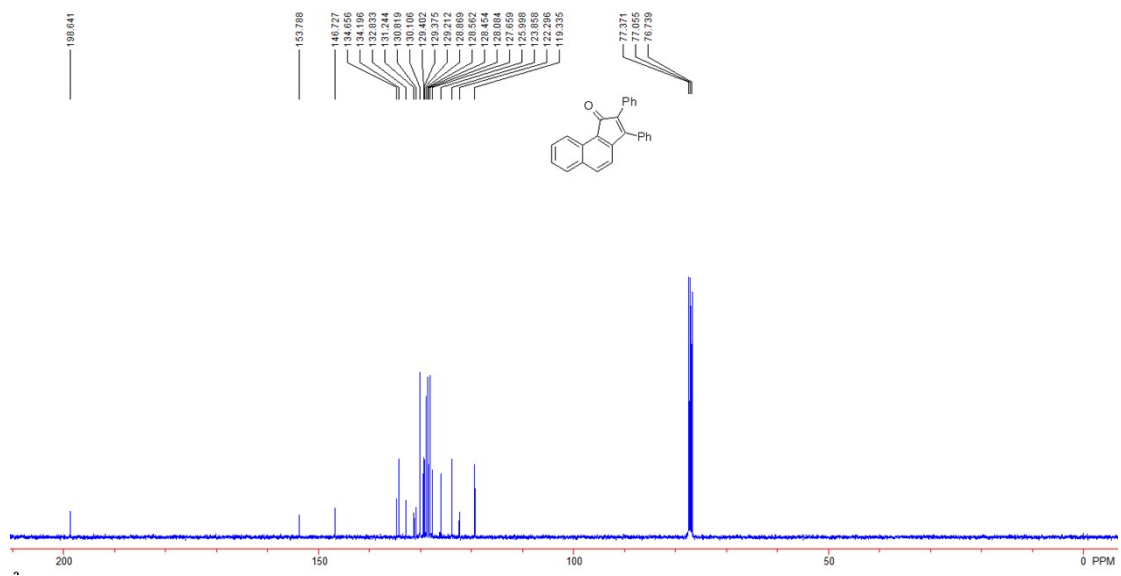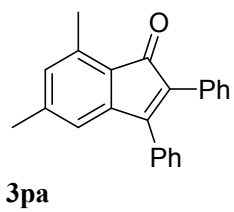

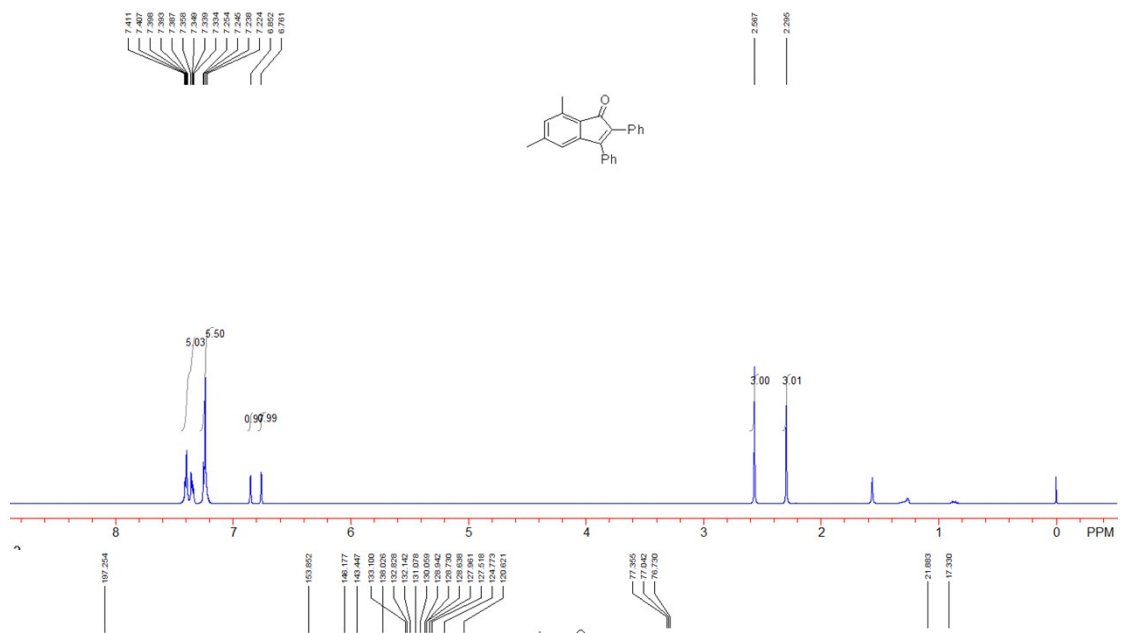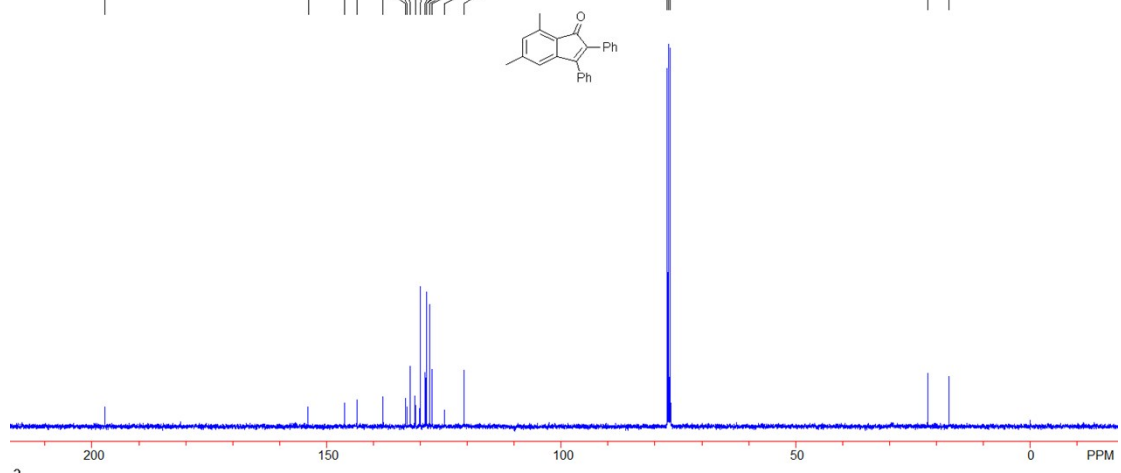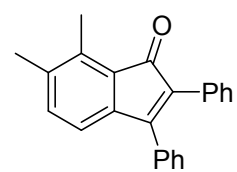

**3qa**

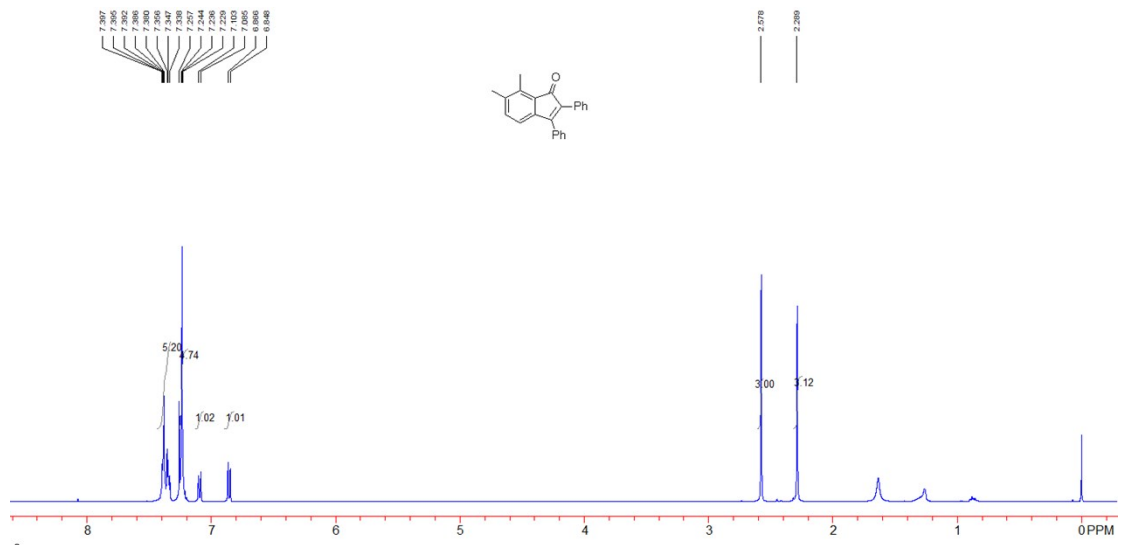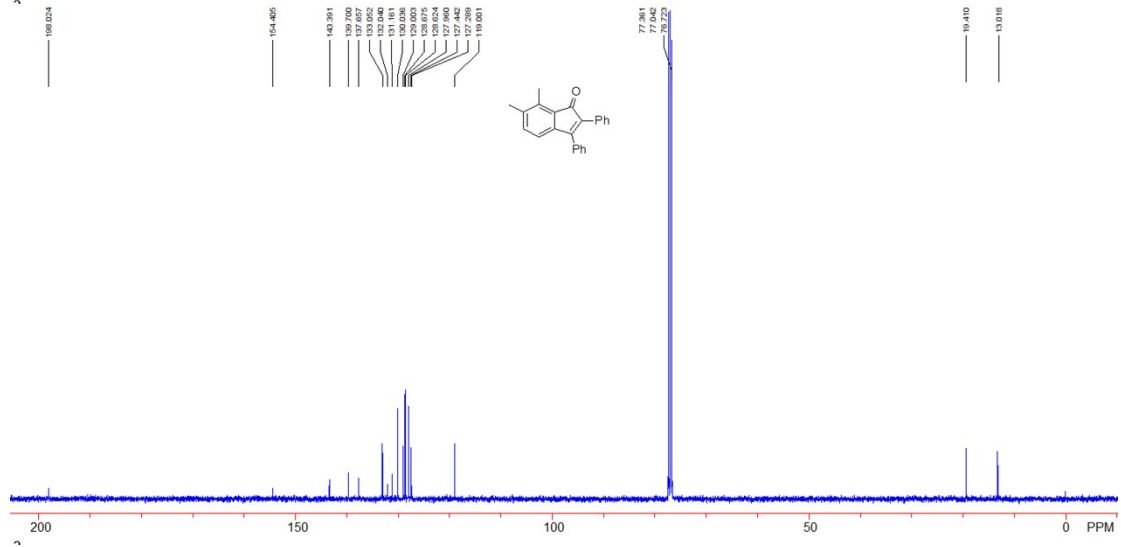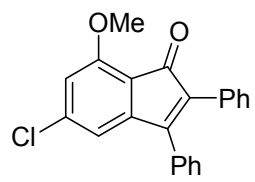

**3ra**

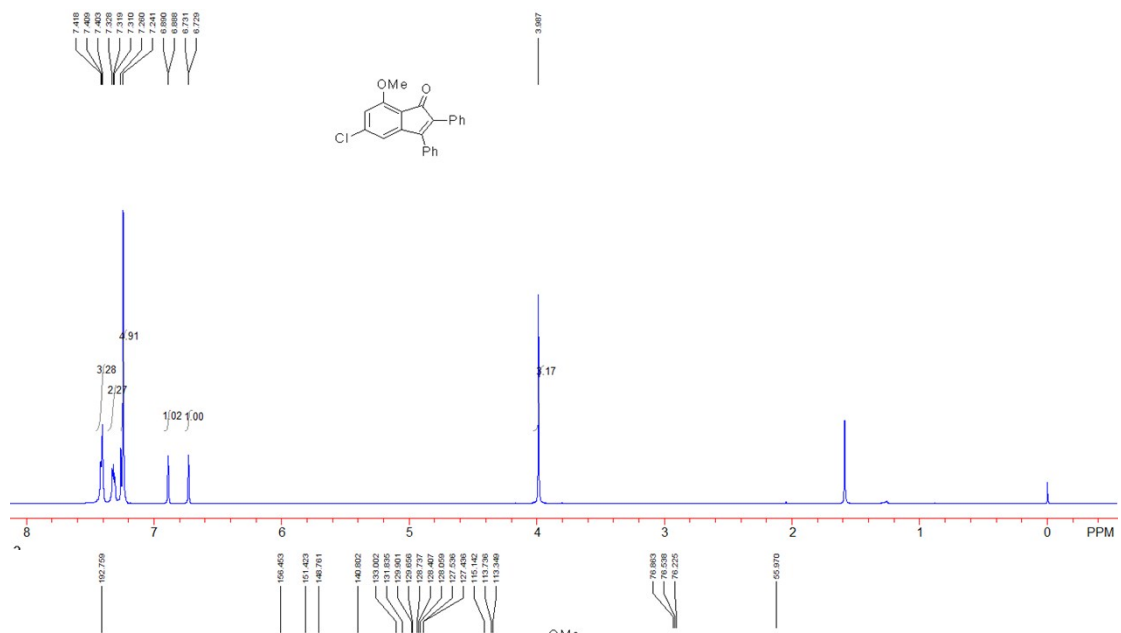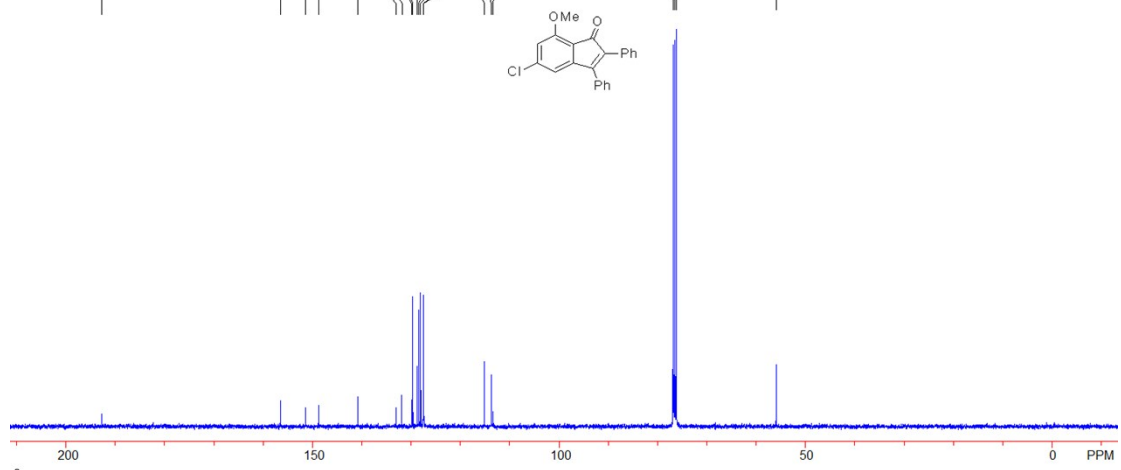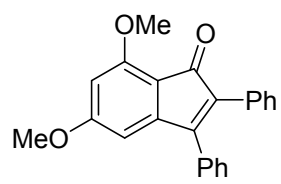

**3sa**

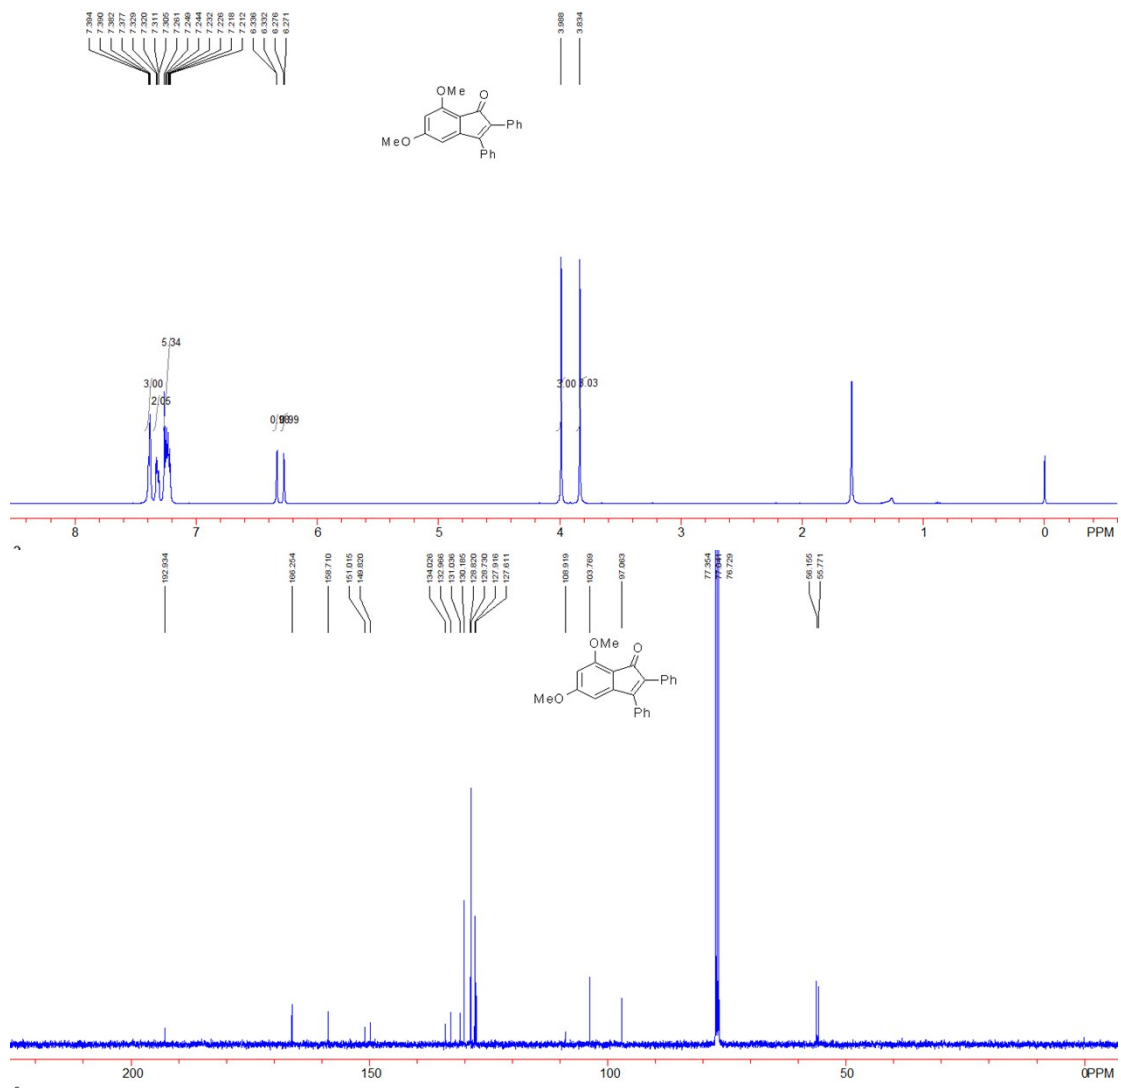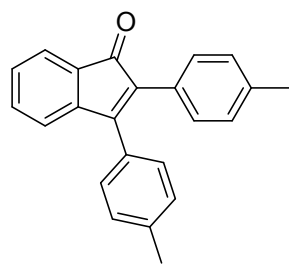

**3ab**

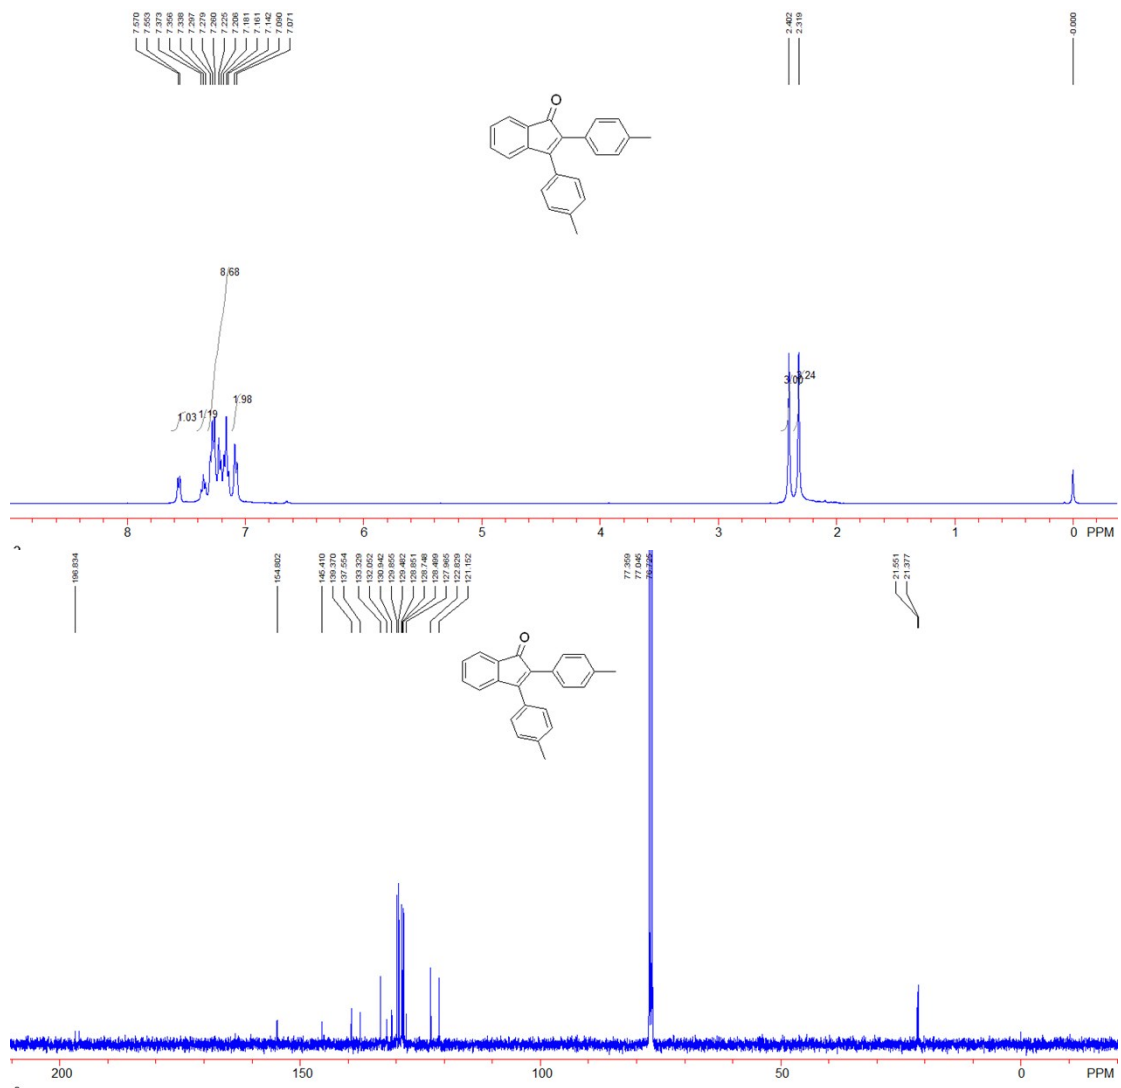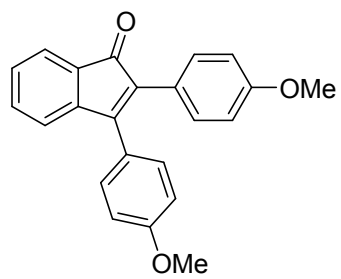

**3ac**

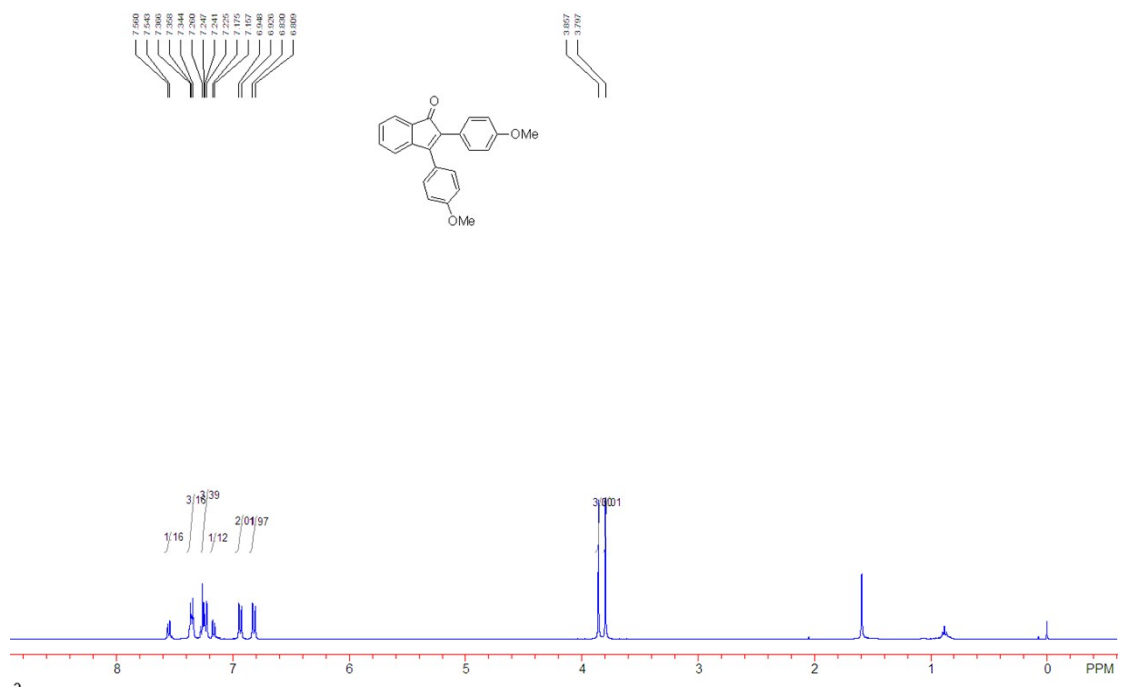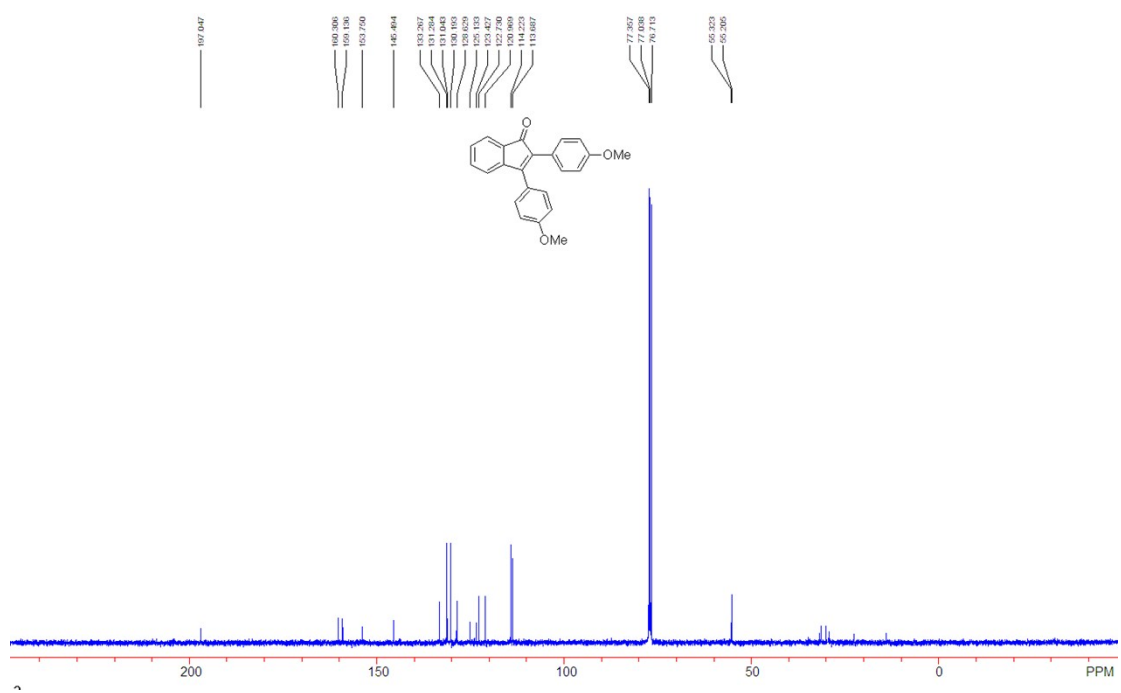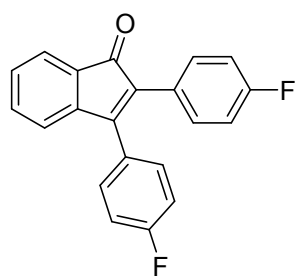

**3ad**

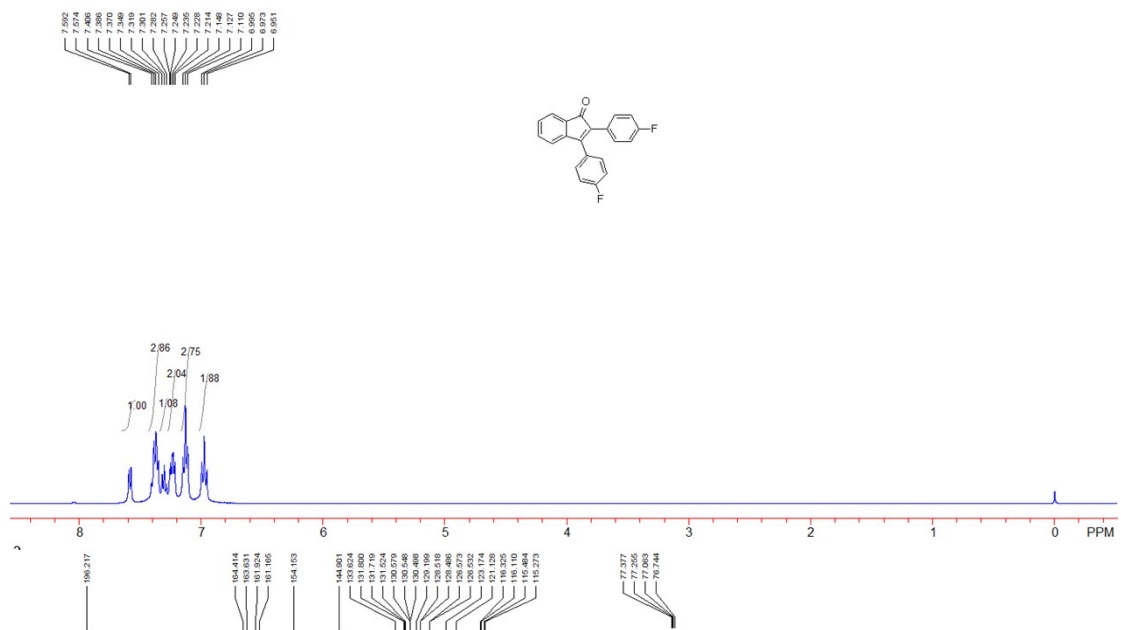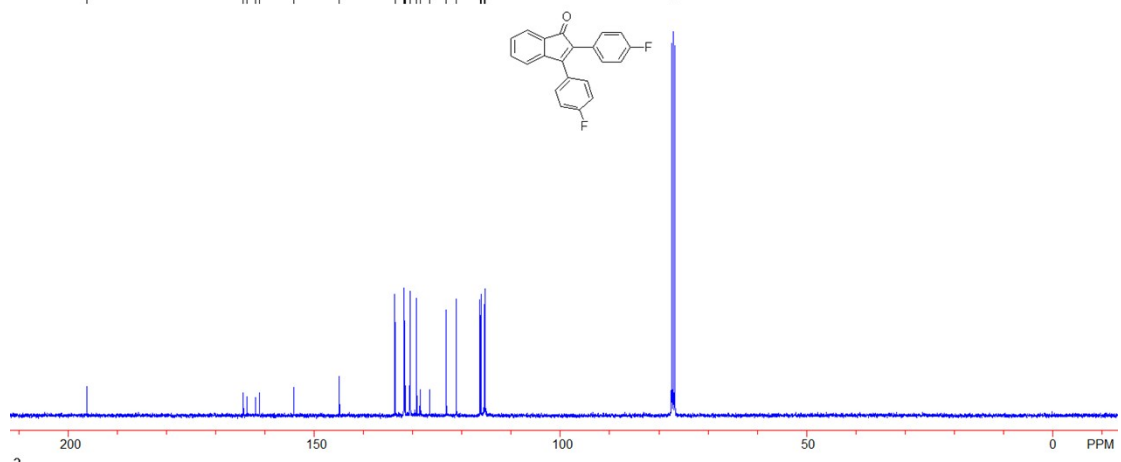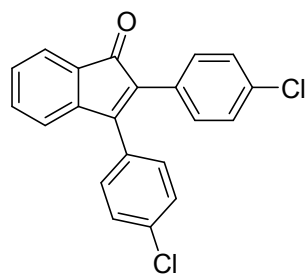

**3ae**



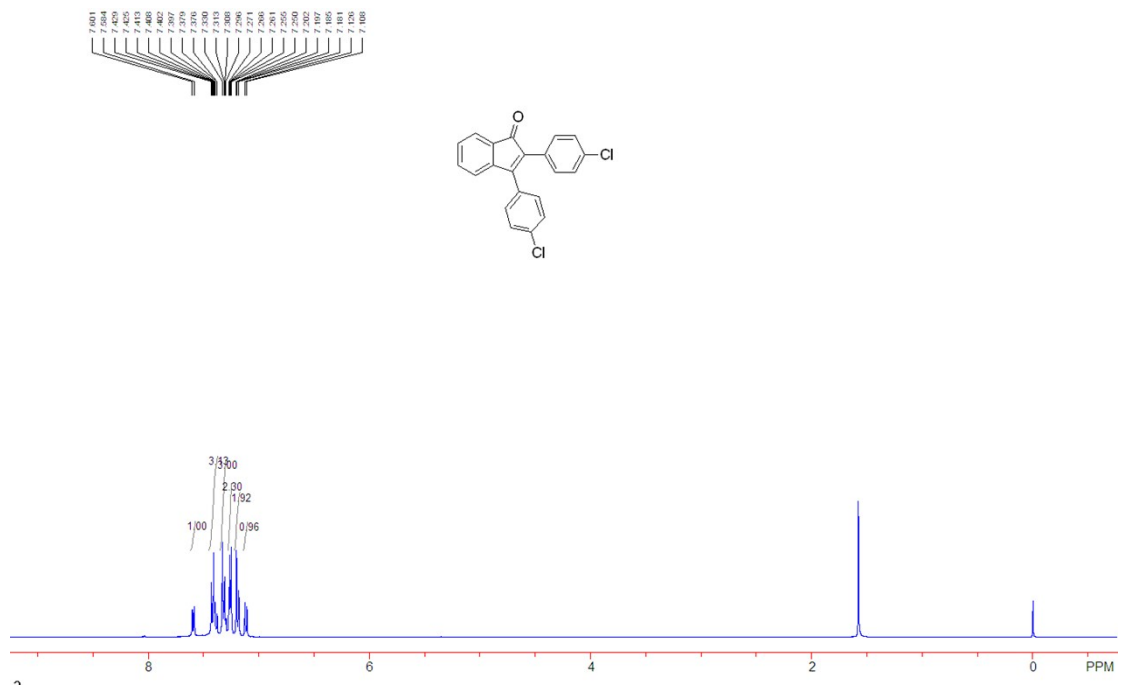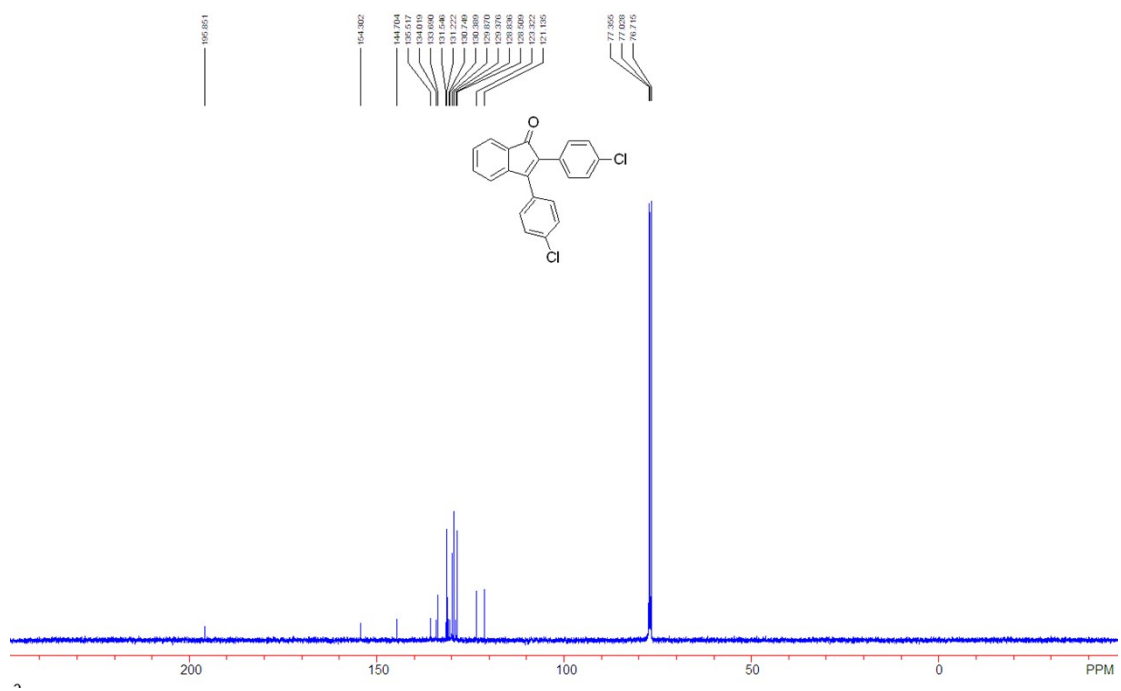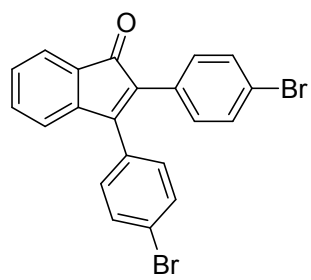

3af

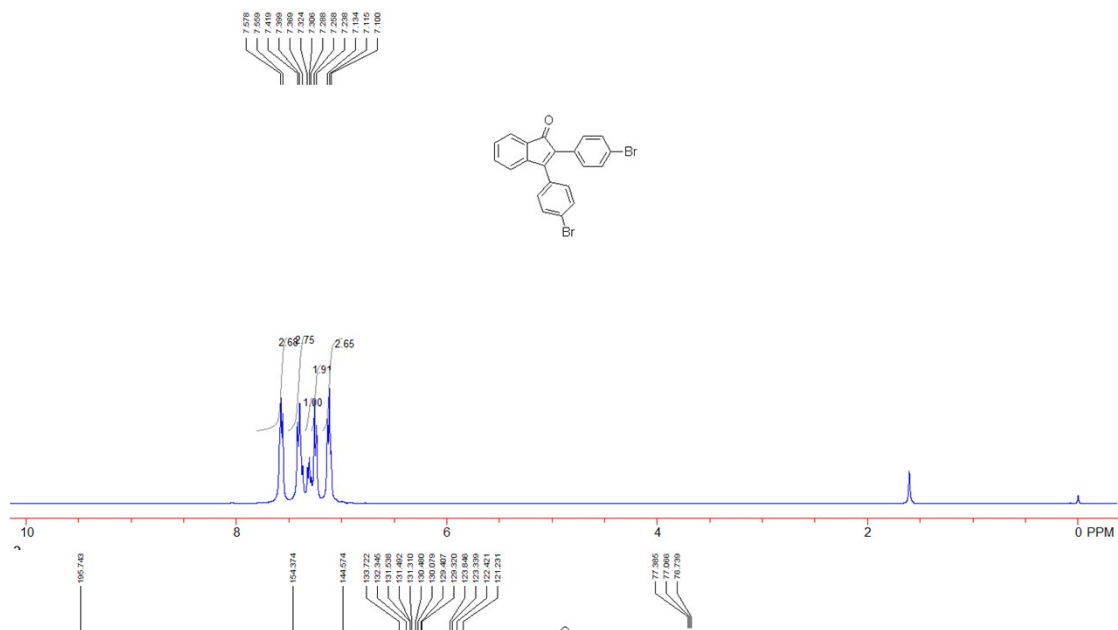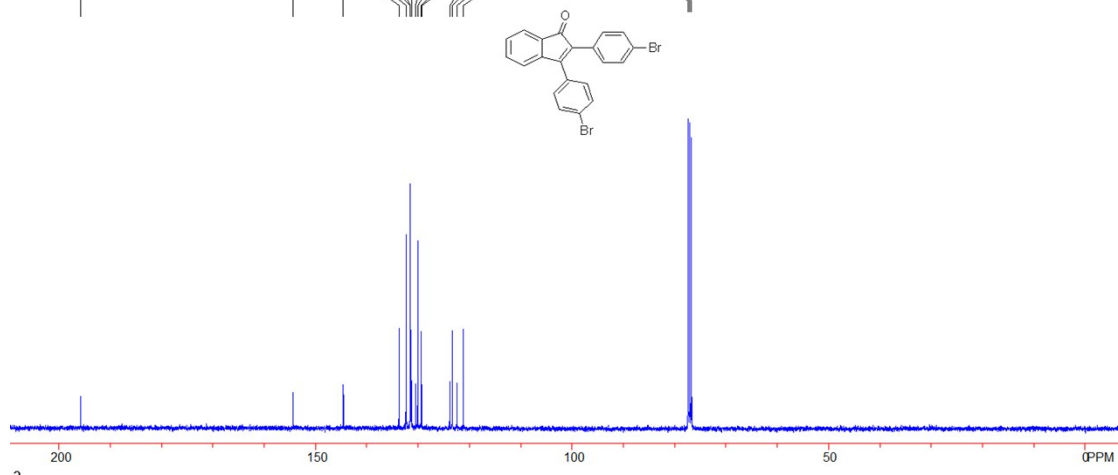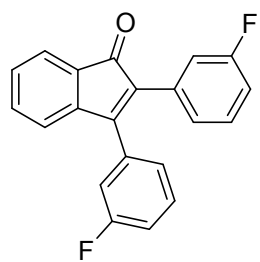

**3ag**



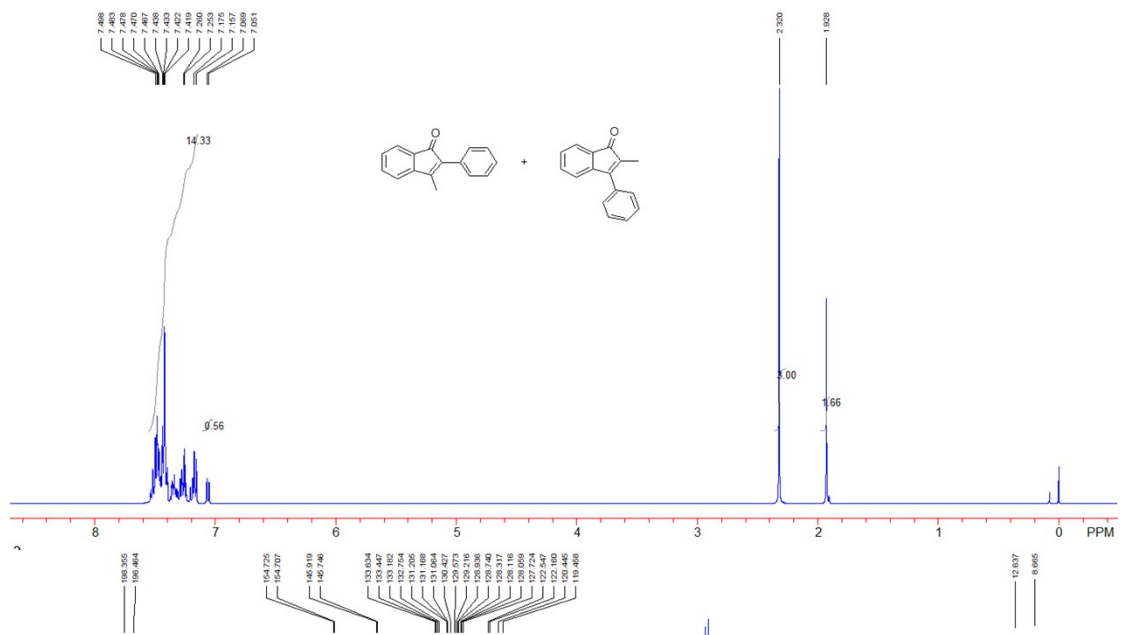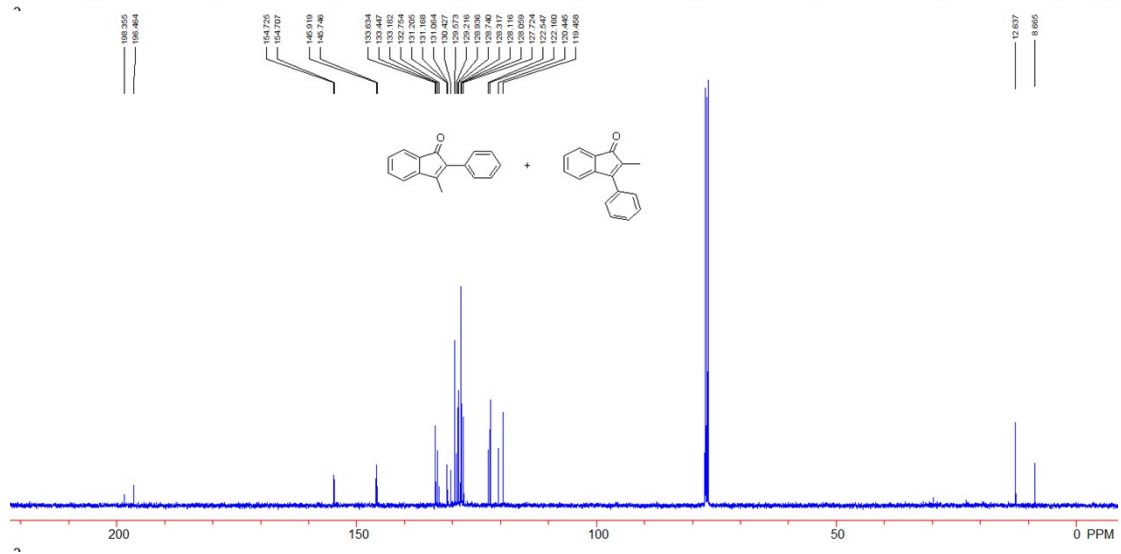

Supplement: c6cc02468h1.pdf [file c6cc02468h1.pdf]
